# Supplementary material for: Belly roll, a GPI-anchored Ly6 protein, regulates Drosophila melanogaster escape behaviors by modulating the excitability of nociceptive peptidergic interneurons
Source: eLife journal article supplement (doi:10.7554/elife.83856), 2023-05-15
Supplement: fig1-data1 [file Summary table of genotypes, statistical testing and graph data for Figure 1.xlsx]

## Sheet: Genotypes
Figure	Abbreivation	Genotypes (Experimental Condition)
Figure 1B	46°C, w1118	w[1118]
	46°C, CS	Canton-S
	48°C, w1118	w[1118]
	48°C, CS	Canton-S
	50°C, w1118	w[1118]
	50°C, CS	Canton-S
Figure 1C and 1 D	38 representative lines of DGRP	Bloomington_Stock_ID	strain
		25174	DGRP-208
		25175	DGRP-301
		25176	DGRP-303
		25177	DGRP-304
		25179	DGRP-307
		25180	DGRP-313
		25181	DGRP-315
		25182	DGRP-324
		25183	DGRP-335
		25184	DGRP-357
		25185	DGRP-358
		25186	DGRP-360
		25187	DGRP-362
		25445	DGRP-365
		25188	DGRP-375
		25189	DGRP-379
		25190	DGRP-380
		25191	DGRP-391
		25192	DGRP-399
		25193	DGRP-427
		25194	DGRP-437
		25195	DGRP-486
		25197	DGRP-517
		25198	DGRP-555
		25199	DGRP-639
		25744	DGRP-705
		25200	DGRP-707
		25201	DGRP-712
		25745	DGRP-714
		25202	DGRP-730
		25203	DGRP-732
		25204	DGRP-765
		25205	DGRP-774
		25206	DGRP-786
		25207	DGRP-799
		25208	DGRP-820
		25209	DGRP-852
		25210	DGRP-859

## Sheet: Statistics
Figure	Genotypes or Experimental Condition (Abbreivation) compared		Statistical test	Significance	P values
	Control group	Experimental group
Figure 1B	46°C, w1118	46°C, CS	Wilcoxon rank sum test	****	<0.0001
	48°C, w1118	48°C, CS	Wilcoxon rank sum test	****	<0.0001
	50°C, w1118	50°C, CS	Wilcoxon rank sum test	****	<0.0001

## Sheet: Figure_1B
Rolling latency (s)
46°C, w1118	46°C, CS	48°C, w1118	48°C, CS	50°C, w1118	50°C, CS
1.87	10.05	0.4	10.05	1.4	1
7.67	4.53	1.06	9.13	0.53	5.47
1.27	10.05	1.06	10.05	0.87	9.93
5.4	10.05	0.2	4	0.93	4.8
10.05	10.05	8.73	10.05	10.05	4.26
7.9	10.05	1.6	8.6	4.94	5.07
1.66	8.8	0.6	6.2	0.27	0.33
1.27	10.05	4.26	10.05	0.47	9.34
10.05	10.05	0.27	7.47	1.6	9.47
0.73	10.05	1.27	10.05	1.67	2.33
4.26	10.05	0.47	10.05	0.34	5.66
2.33	10.05	0.53	6.8	0.8	10.05
2.47	6.46	0.67	10.05	0.54	10.05
2.6	10.05	10.05	9.93	10.05	3.87
1.13	10.05	4.8	10.05	1.74	5.53
2.53	10.05	0.4	0.6	1.6	8.67
8.48	10.05	3.26	3.5	2.93	9.2
10.05	9.47	1.6	9.2	0.87	9.6
8.4	10.05	4.34	10.05	1.33	7
4.33	10.05	1.13	10.05	1.07	3.53
7	5.6	0.94	10.05	0.6	6.27
5.87	4.73	1.54	4.33	0.6	10.05
2.27	10.05	0.6	10.05	0.67	5.6
9.87	10.05	4.93	2.2	2.53	7.2
1.2	10.05	0.46	10.05	0.86	5.73
9.67	10.05	1.33	10.05	3	4.67
2.6	10.05	0.33	10.05	2.07	4.47
1.07	10.05	1.14	5.06	1.74	6.67
1.35	10.05	1.27	9.47	2.34	2.7
10.05	5.2	0.93	10.05	0.93	0.34
10.05	10.05	0.8	10.05	6.13	10.05
1.2	10.05	1.87	4.4	10.05	8.73
1.4	7.4		2.47	0.93	3.27
5.66	10.05
6.6	10.05
1.99	10.05
2.27	5.4
10.05	9.07
9.93
7.06

## Sheet: Figure_1C
Rolling latency (s)
#358	#391	#705	#730	#301	#313	#786	#799	#774	#437	#379	#380	#303	#324	#765	#399	#859	#304	#486	#360	#307	#820	#427	#335	#365	#852	#375	#357	#639	#712	#707	#362	#555	#714	#732	#517	#315	#208
10.05	10.05	10.05	8.27	10.05	10.05	7.6	1.34	9.14	9.6	10.05	4.4	1.47	10.05	1.53	7.67	9.67	10.05	0.6	2.07	10.05	9.06	10.05	5.6	10.05	7.93	10.05	5.54	1.66	3.26	10.05	5.28	2.53	1.47	4.13	10.05	8.34	10.05
9.27	10.05	5.2	10.05	10.05	10.05	10.05	6.07	3.07	3.54	8.13	8.6	0.14	10.05	4.33	5.63	4.27	10.05	10.05	7.42	0.62	10.05	5.27	3.14	2.47	2.4	10.05	10.05	0.6	10.05	10.05	10.05	2.27	3.2	0.46	0.67	9.93	4.8
2.6	10.05	10.05	10.05	10.05	7.47	10.05	10.05	10.05	8.73	2.87	7.8	0.43	3.87	2	10.05	10.05	8.07	9.53	4.97	2.65	8.33	0.94	1.2	2.47	6.4	1.07	0.24	2.27	9.87	2.14	6.25	4.6	3.53	0.4	1.33	0.93	1.33
4.6	10.05	7.13	10.05	10.05	3.8	1.27	9.14	7.93	2	10.05	5.2	10.05	1.8	9.6	3.24	2.6	10.05	5.13	6.65	1.67	8.73	10.05	8.01	10.05	7.33	0.8	7.05	0.86	1.4	2.87	7.87	2.53	2.2	4.26	0.4	2.13	10.05
10.05	10.05	7.8	4.47	10.05	10.05	1.4	10.05	10.05	2.53	10.05	10.05	8.94	0.66	5.6	10.05	0.54	10.05	1.07	10.05	10.05	3.53	10.05	0.33	2.54	6.6	10.05	10.05	10.05	2.94	0.93	10.05	1.4	0.47	0.93	0.6	1.13	0.6
10.05	5.34	10.05	10.05	10.05	5.51	6.67	3.27	3.94	0.2	3.27	10.05	8.02	1.8	10.05	2.6	1.54	7.13	2.07	4.54	10.05	10.05	5.07	10.05	2.54	10.05	1.8	8.06	10.05	10.05	3.8	0.28	10.05	6.33	0.2	0.74	1.94	7.52
10.05	2.93	2.94	3.4	9.87	3.17	10.05	3.2	10.05	10.05	4.6	3.13	8.87	10.05	6.06	10.05	1.94	10.05	2.47	10.05	2.91	9.2	3.27	10.05	3.6	10.05	0.93	4.6	0.74	6.26	3.34	3.47	5.83	6.34	0.27	3.2	10.05	0.83
10.05	4.53	10.05	10.05	8.94	4.08	10.05	2.73	10.05	9.07	10.05	7.87	10.05	0.87	7.53	7.6	6.47	8.27	1.47	10.05	10.05	2.6	2.86	7.86	6.06	7.4	2.13	10.05	3.06	1.46	6.54	3.46	6.53	2.47	1.03	0.93	3.4	10.05
10.05	8.2	10.05	10.05	3.26	10.05	8.03	0.6	10.05	10.05	10.05	4.4	0.46	3	10.05	10.05	6.94	2.6	1.46	10.05	7.01	3.07	0.13	4	3.8	5.2	2.2	2.2	3.8	5.2	6.4	0.4	3.67	2.07	7.6	0.66	1.2	2.33
3.73	10.05	10.05	2.87	10.05	10.05	10.05	4.86	8.06	10.05	4.5	10.05	8.33	6.47	1.4	10.05	7.2	9.4	7.13	6.13	3.33	7.93	5.07	5.64	3.47	5.34	10.05	4.8	4.93	6.6	5.8	5.86	5.73	0.93	7.8	10.05	1.13	2.54
10.05	10.05	4.2	2.53	9.93	6.47	4.14	5.86	10.05	7.93	8.8	10.05	4.33	10.05	10.05	10.05	2	1.14	6.73	9.54	10.05	2.86	8.73	10.05	2	5.47	3.06	6.6	1.87	3.67	1.8	4.4	2.8	5.26	5.06	3.73	3.07	4.27
10.05	9.01	7.74	1.47	10.05	7.53	2.73	10.05	7.06	5.26	10.05	10.05	2.54	10.05	10.05	2.54	7.93	10.05	5.6	10.05	2.13	10.05	5.14	2.54	10.05	2.34	5	2.34	10.05	5.34	8.13	8	4.54	3.52	7.86	4.47	4.13	1.94
10.05	9.94	10.05	4.09	10.05	10.05	3.07	10.05	4	10.05	3.53	7.53	4.47	6.07	10.05	0.67	2.67	4.71	6.87	2.53	6.74	1.2	6.47	3.34	8.93	10.05	4.2	1	10.05	10.05	3.4	3.07	8.73	6.4	4.27	10.05	1.27	2.13
1.4	10.05	10.05	10.05	5.07	9.66	3.67	10.05	5.46	9.6	8.47	2.14	2.07	10.05	2.66	1.07	3.4	0.4	8.43	10.05	8.99	6.27	6.27	3.93	1.8	0.73	2.53	9.6	2.27	4.67	10.05	10.05	2.2	10.05	0.6	1.74	4.46	4.06
10.05	10.05	7.87	5.53	10.05	5	3.07	1.4	7.6	10.05	10.05	9.47	10.05	10.05	2.33	9.53	4.73	4.54	0.47	7	7.2	2.86	1.87	2.55	10.05	4	5.6	0.93	8.67	2.74	4.73	2	2.8	5.27	1.4	3.33	2.8	10.05
10.05	9.14	10.05	0.86	9.27	2.2	8.47	8.87	3.27	10.05	4.6	1.87	8.93	5.8	4.27	7	10.05	5.6	10.05	10.05	1.67	4.27	10.05	8.2	1.6	6.2	4.8	1.33	2.33	0.8	3	0.6	3.07	9	10.05	0.53	0.73	6.14
3.13	7.73	10.05	1.94	6.13	10.05	4.47	10.05	8.87	7.8	4.07	1.4	10.05	4.86	3.2	2.34	10.05	3.33	2.93	1.26	0.53	4.2	6.07	10.05	10.05	1.87	10.05	1.87	6.73	5.73	2.67	0.93	3.13	5.93	2.4	5.73	5	0.73
10.05	10.05	10.05	10.05	6.46	10.05	10.05	10.05	9	4.87	7.27	4.07	10.05	2.8	10.05	7.94	9.93	10.05	10.05	1.87	3	8.67	0.73	5.26	0.87	1.06	5.87	0.93	7.13	4.06	5.6	0.33	1.93	1.6	9.4	3.6	2.6	2.73
9.67	9.26	10.05	10.05	6.2	10.05	7.07	2.33	5.14	7.13	3	10.05	10.05	4.26	7.73	0	10.05	6.67	5.53	9.54	1.8	10.05	10.05	4.73	2.6	2.13	8.93	4.4	2.13	5.13	2.47	0.67	3.93	6.34	0.6	1.8	2.26	2.93
10.05	10.05	7.86	10.05	6	10.05	10.05	1	2.47	6	10.05	5.33	10.05	3.67	4.73	7.63	10.05	10.05	4.2	6.07	10.05	5.46	4.26	7.33	10.05	2.2	1.47	3.2	10.05	4.14	7.66	2.14	2.47	7.27	1.67	7.8	6	4.67
10.05	6.94	10.05	10.05	3.33	10.05	10.05	4.67	10.05	10.05	9.2	10.05	2	7.27	10.05	10.05	6.54	3.81	4.4	4.47	6.53	2.94	10.05	9.53	4.13	10.05	7.2	10.05	3.26	4.4	1.47	6.74	2.07	7.46	1.6	10.05	1.67	2.27
10.05	10.05	10.05	6.47	9.54	10.05	10.05	7	10.05	8	10.05	10.05	10.05	9.6	10.05	6.86	10.05	2.47	10.05	5.53	3.6	6.27	5.53	10.05	10.05	1.27	1.6	0.93	3.66	1.67	10.05	1.2	5.13	2.74	2.2	2.27	6.46	1.27
4.73	10.05	3.47	10.05	4.6	8.06	10.05	10.05	7.6	10.05	10.05	4	0.86	10.05	9.07	8.46	4.26	6.27	7.47	6.93	10.05	6	7.14	3.6	10.05	7.73	10.05	10.05	3.06	5	10.05	1.26	0.53	4.6	5.07	6.4	1.66	0.47
9.93	9.8	10.05	10.05	10.05	8.4	3.86	10.05	1.6	10.05	3.6	10.05	5.67	9	10.05	10.05	10.05	7	8	7.46	9.53	7.33	5.87	8	3.33	1.74	1.34	1.73	10.05	6.8	0.47	4.33	4.2	10.05	10.05	1	3.33	0.8
8.6	10.05	10.05	2.87	10.05	2.54	10.05	10.05	10.05	10.05	1.14	10.05	10.05	10.05	10.05	1.2	9.4	4	10.05	3.8	3.66	10.05	10.05	5.47	10.05	1.4	6.91	1.07	6.87	10.05	1.26	6.47	4	2.4	2.86	10.05	7.4	4.6
10.05	3.6	9.54	10.05	10.05	10.05	10.05	8.4	10.05	6.2	4.2	4.07	10.05	10.05	7.2	3	10.05	9.8	10.05	1.4	10.05	4.66	7.4	5.06	10.05	1.93	7.4	0.93	10.05	0.94	0.8	3.07	10.05	1.6	3.94	10.05	5.53	4.07
10.05	3.67	4.07	4.4	10.05	5.67	10.05	7	10.05	6.73	10.05	10.05	0.8	6.2	7.4	8.34	2.26	1.74	0.67	3.8	2.07	10.05	6.14	10.05	10.05	3.66	4.2	10.05	10.05	4.47	0.47	3.66	5.6	0.93	8.74	1.27	5.14	3.53
10.05	10.05	10.05	4.73	3	5.93	10.05	10.05	5.67	10.05	7.6	6.33	4.74	10.05	10.05	4.73	2.33	0.74	8.67	10.05	2.27	3.87	8.8	9.33	10.05	7.8	5.93	0.66	3.03	4	5.2	10.05	0.53	2.07	5.26	3.4	0.93	2
10.05	1.27	10.05	10.05	1.07	10.05	10.05	10.05	8.6	8.46	2.2	10.05	3.67	10.05	8.07	10.05	10.05	10.05	10.05	6.13	7.33	4.86	9.54	10.05	10.05	10.05	10.05	7	10.05	2.8	7.26	6.6	4.73	10.05	2.8	7.53	0.87	0.87
8.49			6.33				10.05								1.47																	8

## Sheet: Figure_1D
strain	rolling probability in 2s (%)	rolling probability in 5s (%)	rolling probability in 10s (%)
DGRP-208	33.33	76.67	83.33
DGRP-301	3.33	16.67	50
DGRP-303	23.33	43.33	63.33
DGRP-304	13.33	36.67	70
DGRP-307	16.67	46.67	70
DGRP-313	0	20	50
DGRP-315	36.67	73.33	96.67
DGRP-324	13.33	33.33	56.67
DGRP-335	6.67	33.33	76.67
DGRP-357	36.67	56.67	76.67
DGRP-358	3.23	19.35	35.48
DGRP-360	10	33.33	70
DGRP-362	30	56.67	86.67
DGRP-365	13.33	50	56.67
DGRP-375	23.33	50	76.67
DGRP-379	3.33	40	60
DGRP-380	6.67	30	56.67
DGRP-391	0	16.67	46.67
DGRP-399	13.33	33.33	70
DGRP-427	15.38	23.33	73.33
DGRP-437	6.67	16.67	63.33
DGRP-486	20	36.67	73.33
DGRP-517	40	66.67	80
DGRP-555	12.9	67.74	93.55
DGRP-639	16.67	53.33	66.67
DGRP-705	0	13.33	36.67
DGRP-707	23.33	53.33	83.33
DGRP-712	16.67	60	86.67
DGRP-714	20	56.67	90
DGRP-730	9.68	35.48	48.39
DGRP-732	36.67	66.67	93.33
DGRP-765	10	30	60
DGRP-774	3.33	20	60
DGRP-786	6.67	30	50
DGRP-799	12.9	32.26	58.06
DGRP-820	3.33	40	76.67
DGRP-852	23.33	43.33	83.33
DGRP-859	13.33	40	70

## Sheet: Figure_1E and F
4 distinct statistical metrics of rolling behavior of DGRP lines
strain	rolling probability in 5s (%)	rolling probability in 10s (%)	average latency	median latency
DGRP-208	76.67	83.33	2.78	2.83
DGRP-301	16.67	50	6.18	9.99
DGRP-303	43.33	63.33	4.04	8.18
DGRP-304	36.67	70	4.92	6.84
DGRP-307	46.67	70	4.06	6.64
DGRP-313	20	50	5.7	9.86
DGRP-315	73.33	96.67	3.45	2.94
DGRP-324	33.33	56.67	4.59	8.14
DGRP-335	33.33	76.67	5.23	5.62
DGRP-357	56.67	76.67	3.35	4.5
DGRP-358	19.35	35.48	6.01	10.05
DGRP-360	33.33	70	5.2	6.79
DGRP-362	56.67	86.67	3.73	4
DGRP-365	50	56.67	3.37	5.53
DGRP-375	50	76.67	4.05	5.3
DGRP-379	40	60	5.06	8.3
DGRP-380	30	56.67	5.15	8.24
DGRP-391	16.67	46.67	6.53	10.05
DGRP-399	33.33	70	5.13	7.65
DGRP-427	23.33	73.33	5.12	6.21
DGRP-437	16.67	63.33	6.44	8.7
DGRP-486	36.67	73.33	4.59	6.8
DGRP-517	66.67	80	2.75	3.27
DGRP-555	67.74	93.55	3.81	3.93
DGRP-639	53.33	66.67	3.45	4.37
DGRP-705	13.33	36.67	6.17	10.05
DGRP-707	53.33	83.33	3.78	4.27
DGRP-712	60	86.67	4.06	4.44
DGRP-714	56.67	90	3.86	3.53
DGRP-730	35.48	48.39	4.02	10.05
DGRP-732	66.67	93.33	3.47	3.4
DGRP-765	30	60	5.26	7.9
DGRP-774	20	60	6.03	8.74
DGRP-786	30	50	4.83	9.26
DGRP-799	32.26	58.06	4.85	8.87
DGRP-820	40	76.67	5.4	6.27
DGRP-852	43.33	83.33	4.3	5.41
DGRP-859	40	70	4.93	6.94
