# Supplementary material for: Belly roll, a GPI-anchored Ly6 protein, regulates Drosophila melanogaster escape behaviors by modulating the excitability of nociceptive peptidergic interneurons
Source: eLife journal article supplement (doi:10.7554/elife.83856), 2023-05-15
Supplement: fig1-data2 [file Genome-wide association results for rolling behavior.xlsx]

## Sheet: 57 Hits
Genome-wide association results for rolling escape behavior: 57 Hits MAF: minor allele frequency; Associating genes are defined as the ones locate within 1kb up/down-stream of target genetic variant;
Statistical metrics	Genetic variant	MAF	Association p-value	Associating genes (location)	Position
Rolling probability in 5 seconds	2L_12154931_SNP	0.2432	3.86654e-07	CG31760[intron]	2L:12154931..12154931
	2R_15876464_SNP	0.2188	4.84905e-07	Intergenic	2R:19988959..19988959
	2R_11379158_SNP	0.1667	1.25153e-06	CG12964[intron]	2R:15491653..15491653
	2L_12155190_SNP	0.2432	1.58015e-06	CG31760[intron]	2L:12155190..12155190
	2L_12155191_SNP	0.2432	1.58015e-06	CG31760[intron]	2L:12155191..12155191
	2R_5702481_SNP	0.1389	1.58822e-06	CG1648[intron], lectin-46Cb[upstream]	2R:9814976..9814976
	2L_14862649_SNP	0.4054	1.70469e-06	Intergenic	2L:14862649..14862649
	2L_20859945_SNP	0.4167	2.20928e-06	CG9336[intron]	2L:20859945..20859945
	2L_2576383_SNP	0.1111	3.70336e-06	insv[non synonymous coding]	2L:2576383..2576383
	3L_21799863_SNP	0.1429	4.05672e-06	Intergenic	3L:21806763..21806763
	3L_16030154_SNP	0.1579	4.37127e-06	CG5895[synonymous coding]	3L:16037054..16037054
	X_10938087_SNP	0.1053	5.0385e-06	CG11160[upstream]	X:11044054..11044054
	X_15876214_SNP	0.1053	5.0385e-06	CG9170[intron]	X:15982181..15982181
	3L_14482462_SNP	0.2162	5.08062e-06	bbg[intron]	3L:14489362..14489362
	X_10937994_SNP	0.1081	5.6495e-06	CG11160[upstream]	X:11043961..11043961
	3R_8376371_SNP	0.1081	6.3981e-06	mir-284[downstream], Octβ2R[UTR5']	3R:12550649..12550649
	X_5208599_SNP	0.2162	6.78779e-06	CG4198[non synonymous coding]	X:5314566..5314566
	3L_11536089_SNP	0.3243	7.06804e-06	Mob2[intron]	3L:11542989..11542989
	X_19001836_SNP	0.1081	7.11222e-06	Intergenic	X:19107803..19107803
	3L_5559190_SNP	0.1351	8.00246e-06	bc10[UTR3']	3L:5566090..5566090
	X_11111441_SNP	0.1579	9.47257e-06	Intergenic	X:11217408..11217408
Rolling probability in 10 seconds	3R_1271336_SNP	0.3333	4.85178e-07	CG14669[intron]	3R:5445614..5445614
	2R_10010517_SNP	0.1714	8.15864e-07	Prosap[intron]	2R:14123012..14123012
	3R_14831753_SNP	0.3429	1.24082e-06	gukh[intron]	3R:19006031..19006031
	3L_22130777_SNP	0.1892	4.36008e-06	olf413[intron]	3L:22137677..22137677
	2L_15180803_SNP	0.3611	5.86437e-06	CG4168[intron]	2L:15180803..15180803
	2L_15180836_SNP	0.3611	5.86437e-06	CG4168[intron]	2L:15180836..15180836
	2L_15180861_SNP	0.3611	5.86437e-06	CG4168[intron]	2L:15180861..15180861
	2L_15180863_SNP	0.3611	5.86437e-06	CG4168[intron]	2L:15180863..15180863
	X_8937856_DEL	0.303	5.95106e-06	CR43836[intron], Nost[intron]	X:9043823..9043828
	2L_15180815_SNP	0.3429	6.84883e-06	CG4168[intron]	2L:15180815..15180815
	2L_15180816_SNP	0.3429	6.84883e-06	CG4168[intron]	2L:15180816..15180816
	2R_20406585_SNP	0.3243	7.63881e-06	Ir60c[pseudogene], Ir60d[upstream]	2R:24519062..24519062
	2L_14474334_SNP	0.4	8.02287e-06	Intergenic	2L:14474334..14474334
	3L_13762224_INS	0.2121	8.76523e-06	bru-3[intron]	3L:13769124..13769124
	2L_15180827_SNP	0.3429	8.89096e-06	CG4168[intron]	2L:15180827..15180827
	2R_17750945_SNP	0.1944	9.29513e-06	Intergenic	2R:21863440..21863440
	3R_14832050_SNP	0.2895	9.71823e-06	gukh[intron]	3R:19006328..19006328
	2R_15876464_SNP	0.2188	8.16909e-05	Intergenic	2R:19988959..19988959
Average rolling latency	3L_17309565_SNP	0.1765	3.47618e-07	Intergenic	3L:17316465..17316465
	2R_6913332_SNP	0.1944	9.67752e-07	luna[intron]	2R:11025827..11025827
	2L_12154931_SNP	0.2432	2.07109e-06	CG31760[intron]	2L:12154931..12154931
	X_3935741_SNP	0.1053	2.80468e-06	Intergenic	X:4041708..4041708
	2L_2343034_SNP	0.4	4.30436e-06	eys[intron], CG9967[intron]	2L:2343034..2343034
	2R_14977756_SNP	0.1579	4.47581e-06	5-HT1A[UTR5']	2R:19090251..19090251
	3L_5860694_SNP	0.4444	6.38978e-06	Intergenic	3L:5867594..5867594
	3L_17309558_SNP	0.2162	6.81094e-06	Intergenic	3L:17316458..17316458
	3R_11000337_SNP	0.3333	9.26121e-06	Gyc88E[intron], Mf[intron]	3R:15174615..15174615
	2R_15876464_SNP	0.2188	9.26884e-06	Intergenic	2R:19988959..19988959
	2L_4020135_SNP	0.1892	9.27463e-06	Intergenic	2L:4020135..4020135
	2L_3871457_INS	0.2432	9.36762e-06	CG31957[UTR5'], Cep97[downstream]	2L:3871457..3871457
	2R_18117701_SNP	0.1667	1.26228e-05	Intergenic	2R:22230196..22230196
	2R_6872535_SNP	0.1351	2.1023e-05	luna[intron]	2R:10985030..10985030
Median rolling latency	3R_1271336_SNP	0.3333	6.03169e-07	CG14669[intron]	3R:5445614..5445614
	2L_20859945_SNP	0.4167	6.19057e-07	CG9336[intron]	2L:20859945..20859945
	2R_10010517_SNP	0.1714	7.62037e-07	Prosap[intron]	2R:14123012..14123012
	2L_14474334_SNP	0.4	1.22447e-06	Intergenic	2L:14474334..14474334
	2R_15876464_SNP	0.2188	2.1434e-06	Intergenic	2R:19988959..19988959
	2L_12154931_SNP	0.2432	3.2914e-06	CG31760[intron]	2L:12154931..12154931
	X_9161361_INS	0.2778	3.37714e-06	Erk7[UTR5']	X:9267328..9267328
	2L_14474335_DEL	0.3824	5.09839e-06	Intergenic	2L:14474335..14474336
	2L_2348898_SNP	0.4737	8.22643e-06	eys[intron], CG9967[intron]	2L:2348898..2348898
	3L_21799863_SNP	0.1429	8.25753e-06	Intergenic	3L:21806763..21806763
	3L_9821866_SNP	0.2222	8.38233e-06	CG43897[intron]	3L:9828766..9828766
	3L_7638753_SNP	0.4737	8.62471e-06	Intergenic	3L:7645653..7645653
	3L_14482462_SNP	0.2162	8.65027e-06	bbg[intron]	3L:14489362..14489362
	2L_15180815_SNP	0.3429	9.03901e-06	CG4168[intron]	2L:15180815..15180815
	2L_15180816_SNP	0.3429	9.03901e-06	CG4168[intron]	2L:15180816..15180816
	3R_2776988_DEL	0.3158	9.49083e-06	Antp[intron]	3R:6951266..6951274
	3R_2777001_SNP	0.3158	9.49083e-06	Antp[intron]	3R:6951279..6951279
	Total Hits number:
	57

## Sheet: 36 associating genes
Genome-wide association results for rolling escape behavior: 36 Associating genes and corresponding effect/location Associating genes are defined as the ones locate within 1kb up/down-stream of target genetic variant; 16 genes tested in validation test are in bold font.
Associating genes	Annotation Symbol	FlyBase ID	Genetic variant	Position	Effect/Location	Association p-value	Association p-value 2	Association p-value 3
CG4198	CG4198	FBgn0029753	X_5208599_SNP	X:5314566..5314566	non synonymous coding	6.78779e-06
CR43836	CR43836	FBgn0264384	X_8937856_DEL	X:9043823..9043828	non-coding region	5.95106e-06
Nost	CG42388	FBgn0259734	X_8937856_DEL	X:9043823..9043828	intron	5.95106e-06
Erk7	CG32703	FBgn0052703	X_9161361_INS	X:9267328..9267328	5' UTR	3.37714e-06
SmydA-4	CG11160	FBgn0030257	X_10937994_SNP	X:11043961..11043961	<1kb upstream	5.6495e-06
			X_10938087_SNP	X:11044054..11044054	<1kb upstream	5.0385e-06
CG9170	CG9170	FBgn0030716	X_15876214_SNP	X:15982181..15982181	intron	5.0385e-06
eys	CG33955	FBgn0031414	2L_2343034_SNP	2L:2343034..2343034	intron	4.30436e-06
			2L_2348898_SNP	2L:2348898..2348898	intron	8.22643e-06
CG9967	CG9967	FBgn0031413	2L_2343034_SNP	2L:2343034..2343034	intron	4.30436e-06
			2L_2348898_SNP	2L:2348898..2348898	intron	8.22643e-06
insv	CG3227	FBgn0031434	2L_2576383_SNP	2L:2576383..2576383	non synonymous coding	3.70336e-06
Cep97	CG3980	FBgn0031575	2L_3871457_INS	2L:3871457..3871457	<1kb downstream	9.36762e-06
CG31957	CG31957	FBgn0051957	2L_3871457_INS	2L:3871457..3871457	5' UTR	9.36762e-06
CG31760	CG31760	FBgn0051760	2L_12154931_SNP	2L:12154931..12154931	intron	3.2914e-06	2.07109e-06	3.87e-07
			2L_12155190_SNP	2L:12155190..12155190	intron	1.58015e-06
			2L_12155191_SNP	2L:12155191..12155191	intron	1.58015e-06
CG4168	CG4168	FBgn0028888	2L_15180803_SNP	2L:15180803..15180803	intron	5.86437e-06
			2L_15180815_SNP	2L:15180815..15180815	intron	9.03901e-06	6.84883e-06
			2L_15180816_SNP	2L:15180816..15180816	intron	9.03901e-06	6.84883e-06
			2L_15180827_SNP	2L:15180827..15180827	intron	8.89096e-06
			2L_15180836_SNP	2L:15180836..15180836	intron	5.86437e-06
			2L_15180861_SNP	2L:15180861..15180861	intron	5.86437e-06
			2L_15180863_SNP	2L:15180863..15180863	intron	5.86437e-06
CG9336	CG9336	FBgn0032897	2L_20859945_SNP	2L:20859945..20859945	intron	6.19057e-07	2.20928e-06
CG1648	CG1648	FBgn0033446	2R_5702481_SNP	2R:9814976..9814976	intron	1.58822e-06
lectin-46Cb	CG1652	FBgn0040092	2R_5702481_SNP	2R:9814976..9814976	<1kb upstream	1.58822e-06
luna	CG33473	FBgn0040765	2R_6872535_SNP	2R:10985030..10985030	intron	2.1023e-05
			2R_6913332_SNP	2R:11025827..11025827	intron	9.67752e-07
Prosap	CG30483	FBgn0040752	2R_10010517_SNP	2R:14123012..14123012	intron	7.62037e-07	8.15864e-07
CG12964	CG12964	FBgn0034022	2R_11379158_SNP	2R:15491653..15491653	intron	1.25153e-06
5-HT1A	CG16720	FBgn0004168	2R_14977756_SNP	2R:19090251..19090251	5' UTR	4.47581e-06
Ir60c[pseudogene]	CR42290	FBgn0259186	2R_20406585_SNP	2R:24519062..24519062	pseudogene	7.63881e-06
Ir60d	CG42291	FBgn0259187	2R_20406585_SNP	2R:24519062..24519062	<1kb upstream	7.63881e-06
bc10	CG4867	FBgn0040239	3L_5559190_SNP	3L:5566090..5566090	3' UTR	8.00246e-06
CG43897	CG43897	FBgn0264489	3L_9821866_SNP	3L:9828766..9828766	intron	8.38233e-06
Mob2	CG11711	FBgn0259481	3L_11536089_SNP	3L:11542989..11542989	intron	7.06804e-06
bru-3	CG43744	FBgn0264001	3L_13762224_INS	3L:13769124..13769124	intron	8.76523e-06
bbg	CG42230	FBgn0087007	3L_14482462_SNP	3L:14489362..14489362	intron	8.65027e-06	5.08062e-06
CG5895	CG5895	FBgn0036560	3L_16030154_SNP	3L:16037054..16037054	synonymous coding	4.37127e-06
olf413	CG12673	FBgn0037153	3L_22130777_SNP	3L:22137677..22137677	intron	4.36008e-06
CG14669	CG14669	FBgn0037326	3R_1271336_SNP	3R:5445614..5445614	intron	6.03169e-07	4.85178e-07
Antp	CG1028	FBgn0260642	3R_2776988_DEL	3R:6951266..6951274	intron	9.49083e-06
			3R_2777001_SNP	3R:6951279..6951279	intron	9.49083e-06
mir-284	CR42906	FBgn0262383	3R_8376371_SNP	3R:12550649..12550649	<1kb downstream	6.3981e-06
Octβ2R	CG33976	FBgn0038063	3R_8376371_SNP	3R:12550649..12550649	5' UTR	6.3981e-06
Gyc88E	CG4154	FBgn0038295	3R_11000337_SNP	3R:15174615..15174615	intron	9.26121e-06
Mf	CG6803	FBgn0038294	3R_11000337_SNP	3R:15174615..15174615	intron	9.26121e-06
gukh	CG31043	FBgn0026239	3R_14831753_SNP	3R:19006031..19006031	intron	1.24082e-06
			3R_14832050_SNP	3R:19006328..19006328	intron	9.71823e-06
candidate genes :			variants in or near genes :
36			42
