# Supplementary material for: Belly roll, a GPI-anchored Ly6 protein, regulates Drosophila melanogaster escape behaviors by modulating the excitability of nociceptive peptidergic interneurons
Source: eLife journal article supplement (doi:10.7554/elife.83856), 2023-05-15
Supplement: fig1-figsupp1-data1 [file 4 statistical metrics of rolling behavior of DGRP lines.xlsx]

## Sheet: statistical metrics
4 distinct statistical metrics of rolling behavior of DGRP lines
strain	rolling probability in 5s (%)	rolling probability in 10s (%)	average latency	median latency
DGRP-208	76.67	83.33	2.78	2.83
DGRP-301	16.67	50	6.18	9.99
DGRP-303	43.33	63.33	4.04	8.18
DGRP-304	36.67	70	4.92	6.84
DGRP-307	46.67	70	4.06	6.64
DGRP-313	20	50	5.7	9.86
DGRP-315	73.33	96.67	3.45	2.94
DGRP-324	33.33	56.67	4.59	8.14
DGRP-335	33.33	76.67	5.23	5.62
DGRP-357	56.67	76.67	3.35	4.5
DGRP-358	19.35	35.48	6.01	10.05
DGRP-360	33.33	70	5.2	6.79
DGRP-362	56.67	86.67	3.73	4
DGRP-365	50	56.67	3.37	5.53
DGRP-375	50	76.67	4.05	5.3
DGRP-379	40	60	5.06	8.3
DGRP-380	30	56.67	5.15	8.24
DGRP-391	16.67	46.67	6.53	10.05
DGRP-399	33.33	70	5.13	7.65
DGRP-427	23.33	73.33	5.12	6.21
DGRP-437	16.67	63.33	6.44	8.7
DGRP-486	36.67	73.33	4.59	6.8
DGRP-517	66.67	80	2.75	3.27
DGRP-555	67.74	93.55	3.81	3.93
DGRP-639	53.33	66.67	3.45	4.37
DGRP-705	13.33	36.67	6.17	10.05
DGRP-707	53.33	83.33	3.78	4.27
DGRP-712	60	86.67	4.06	4.44
DGRP-714	56.67	90	3.86	3.53
DGRP-730	35.48	48.39	4.02	10.05
DGRP-732	66.67	93.33	3.47	3.4
DGRP-765	30	60	5.26	7.9
DGRP-774	20	60	6.03	8.74
DGRP-786	30	50	4.83	9.26
DGRP-799	32.26	58.06	4.85	8.87
DGRP-820	40	76.67	5.4	6.27
DGRP-852	43.33	83.33	4.3	5.41
DGRP-859	40	70	4.93	6.94
