# Supplementary material for: Belly roll, a GPI-anchored Ly6 protein, regulates Drosophila melanogaster escape behaviors by modulating the excitability of nociceptive peptidergic interneurons
Source: eLife journal article supplement (doi:10.7554/elife.83856), 2023-05-15
Supplement: fig1-figsupp1-data2 [file Summary table of genotypes, statistical testing and graph data for Figure 1-figure supplement 1.xlsx]

## Sheet: Genotypes
Figure	Abbreivation	Genotypes (Experimental Condition)
Figure 1 - figure supplement 1A	38 representative lines of DGRP	Bloomington_Stock_ID	strain
		25174	DGRP-208
		25175	DGRP-301
		25176	DGRP-303
		25177	DGRP-304
		25179	DGRP-307
		25180	DGRP-313
		25181	DGRP-315
		25182	DGRP-324
		25183	DGRP-335
		25184	DGRP-357
		25185	DGRP-358
		25186	DGRP-360
		25187	DGRP-362
		25445	DGRP-365
		25188	DGRP-375
		25189	DGRP-379
		25190	DGRP-380
		25191	DGRP-391
		25192	DGRP-399
		25193	DGRP-427
		25194	DGRP-437
		25195	DGRP-486
		25197	DGRP-517
		25198	DGRP-555
		25199	DGRP-639
		25744	DGRP-705
		25200	DGRP-707
		25201	DGRP-712
		25745	DGRP-714
		25202	DGRP-730
		25203	DGRP-732
		25204	DGRP-765
		25205	DGRP-774
		25206	DGRP-786
		25207	DGRP-799
		25208	DGRP-820
		25209	DGRP-852
		25210	DGRP-859

## Sheet: Statistics
Figure	Genotypes or Experimental Condition (Abbreivation) compared		Statistical test	R values
	group 1	group 2
Figure 1 - figure supplement 1A	rolling probability in 2s (%)	rolling probability in 5s (%)	Pearson's correlation coefficient	0.828866
	rolling probability in 2s (%)	rolling probability in 10s (%)	Pearson's correlation coefficient	0.730022
	rolling probability in 5s (%)	rolling probability in 10s (%)	Pearson's correlation coefficient	0.811985

## Sheet: Figure 1 - figure supplement 1A
strain	rolling probability in 2s (%)	rolling probability in 5s (%)	rolling probability in 10s (%)
DGRP-208	33.33	76.67	83.33
DGRP-301	3.33	16.67	50
DGRP-303	23.33	43.33	63.33
DGRP-304	13.33	36.67	70
DGRP-307	16.67	46.67	70
DGRP-313	0	20	50
DGRP-315	36.67	73.33	96.67
DGRP-324	13.33	33.33	56.67
DGRP-335	6.67	33.33	76.67
DGRP-357	36.67	56.67	76.67
DGRP-358	3.23	19.35	35.48
DGRP-360	10	33.33	70
DGRP-362	30	56.67	86.67
DGRP-365	13.33	50	56.67
DGRP-375	23.33	50	76.67
DGRP-379	3.33	40	60
DGRP-380	6.67	30	56.67
DGRP-391	0	16.67	46.67
DGRP-399	13.33	33.33	70
DGRP-427	15.38	23.33	73.33
DGRP-437	6.67	16.67	63.33
DGRP-486	20	36.67	73.33
DGRP-517	40	66.67	80
DGRP-555	12.9	67.74	93.55
DGRP-639	16.67	53.33	66.67
DGRP-705	0	13.33	36.67
DGRP-707	23.33	53.33	83.33
DGRP-712	16.67	60	86.67
DGRP-714	20	56.67	90
DGRP-730	9.68	35.48	48.39
DGRP-732	36.67	66.67	93.33
DGRP-765	10	30	60
DGRP-774	3.33	20	60
DGRP-786	6.67	30	50
DGRP-799	12.9	32.26	58.06
DGRP-820	3.33	40	76.67
DGRP-852	23.33	43.33	83.33
DGRP-859	13.33	40	70
