# Supplementary material for: Belly roll, a GPI-anchored Ly6 protein, regulates Drosophila melanogaster escape behaviors by modulating the excitability of nociceptive peptidergic interneurons
Source: eLife journal article supplement (doi:10.7554/elife.83856), 2023-05-15
Supplement: fig2-data1 [file Summary table of genotypes, statistical testing and graph data for Figure 2.xlsx]

## Sheet: Genotypes
Figure	Abbreivation	Genotypes (Experimental Condition)
Figure 2A	nSyb>yv	y[1] w[1118]/y[1] v[1]; +/+; nSyb-GAL4/+
	nSyb>eys RNAi	y[1] w[1118]/y[1] v[1]; +/+; nSyb-GAL4/UAS-eys-RNAi[JF02463]
	nSyb>eys RNAi	y[1] w[1118]/y[1] v[1]; +/+; nSyb-GAL4/UAS-eys-RNAi[JF02708]
	nSyb>CG9336 RNAi	y[1] w[1118]/y[1] v[1]; +/+; nSyb-GAL4/UAS-CG9336(bero)-RNAi[JF03422]
	nSyb>luna RNAi	y[1] w[1118]/y[1] v[1]; +/+; nSyb-GAL4/UAS-luna-RNAi[JF02430]
	nSyb>Prosap RNAi	y[1] w[1118]/y[1] sc[*] v[1] sev[21]; +/+; nSyb-GAL4/UAS-Prosap-RNAi[HMS02177]
	nSyb>CG14669 RNAi	y[1] w[1118]/y[1] sc[*] v[1] sev[21]; +/+; nSyb-GAL4/UAS-CG14669-RNAi[HMS03010]
	nSyb>gukh RNAi	y[1] w[1118]/y[1] sc[*] v[1] sev[21]; +/+; nSyb-GAL4/UAS-gukh-RNAi[HMC03681]
	nSyb>Antp RNAi	y[1] w[1118]/y[1] sc[*] v[1] sev[21]; +/+; nSyb-GAL4/UAS-Antp-RNAi[HMC05799]
	nSyb>Erk7 RNAi	y[1] w[1118]/y[1] v[1]; +/+; nSyb-GAL4/UAS-Erk7-RNAi[HMC04378]
	nSyb>5HT1A RNAi	y[1] w[1118]/y[1] v[1]; +/+; nSyb-GAL4/UAS-5HT1A-RNAi[JF01852]
	nSyb>bc10 RNAi	y[1] w[1118]/y[1] v[1]; UAS-bc10-RNAi[HMJ22879]/+; nSyb-GAL4/+
	nSyb>CG31760 RNAi	y[1] w[1118]/y[1] sc[*] v[1] sev[21]; +/+; nSyb-GAL4/UAS-CG31760-RNAi[HMC03410]
	nSyb>CG4168 RNAi	y[1] w[1118]/y[1] v[1]; +/+; nSyb-GAL4/UAS-CG4168-RNAi[JF03163]
	nSyb>CG43897 RNAi	y[1] w[1118]/y[1] v[1]; +/+; nSyb-GAL4/UAS-CG43897-RNAi[JF01132]
	nSyb>bru3 RNAi	y[1] w[1118]/y[1] sc[*] v[1] sev[21]; UAS-bru3-RNAi[HMS02702]/+; nSyb-GAL4/+
	nSyb>Gyc88E RNAi	y[1] w[1118]/y[1] v[1]; +/+; nSyb-GAL4/UAS-Gyc88E-RNAi[HM05096]
	nSyb>olf413 RNAi	y[1] w[1118]/y[1] v[1]; +/+; nSyb-GAL4/UAS-olf413-RNAi[JF02439]
Figure 2E	nSyb>attP2 (control)	y[1] w[1118]/y[1] v[1]; +/+; nSyb-GAL4/attP2
	nSyb>bero RNAishRNA#2	y[1] w[1118]/y[1] v[1]; +/+; nSyb-GAL4/UAS-bero[shRNA#2]
	attP2 (w1118 background)	w[1118]/y[1] v[1]; +/+; attP2/+
	bero RNAishRNA#2 (w1118 background)	w[1118]/y[1] v[1]; +/+; UAS-bero[shRNA#2]/+
	attP2 (Canton-S background)	y[1] v[1]/+; +/+; attP2/+ (Canton-S background)
	bero RNAishRNA#2 (Canton-S background)	y[1] v[1]/+; +/+; UAS-bero[shRNA#2]/+ (Canton-S background)
	attP2 (yw background)	y[1] w[1118]/y[1] v[1]; +/+; attP2/+
	bero RNAishRNA#2 (yw background)	y[1] w[1118]/y[1] v[1]; +/+; UAS-bero[shRNA#2]/+
Figure 2F	Canton-S	Canton-S
	beroKO/+ (CS background)	bero[KO]/+ (Canton-S background)
	beroKO/beroKO (CS background)	bero[KO]/bero[KO] (Canton-S background)

## Sheet: Statistics
Figure	Genotypes or Experimental Condition (Abbreivation) compared		Statistical test	Significance	P values
	Control group	Experimental group
Figure 2A	nSyb>yv	nSyb>eys RNAi	Wilcoxon rank sum test	n.s.	0.951458
		nSyb>eys RNAi	Wilcoxon rank sum test	n.s.	0.812456
		nSyb>CG9336 RNAi	Wilcoxon rank sum test	****	<0.0001
		nSyb>luna RNAi	Wilcoxon rank sum test	n.s.	0.065552
		nSyb>Prosap RNAi	Wilcoxon rank sum test	n.s.	0.145998
		nSyb>CG14669 RNAi	Wilcoxon rank sum test	n.s.	0.622169
		nSyb>gukh RNAi	Wilcoxon rank sum test	n.s.	0.548137
		nSyb>Antp RNAi	Wilcoxon rank sum test	n.s.	0.153182
		nSyb>Erk7 RNAi	Wilcoxon rank sum test	n.s.	0.053138
		nSyb>5HT1A RNAi	Wilcoxon rank sum test	n.s.	0.799106
		nSyb>bc10 RNAi	Wilcoxon rank sum test	n.s.	0.438231
		nSyb>CG31760 RNAi	Wilcoxon rank sum test	n.s.	0.895135
		nSyb>CG4168 RNAi	Wilcoxon rank sum test	n.s.	0.401049
		nSyb>CG43897 RNAi	Wilcoxon rank sum test	n.s.	0.195341
		nSyb>bru3 RNAi	Wilcoxon rank sum test	n.s.	0.760842
		nSyb>Gyc88E RNAi	Wilcoxon rank sum test	n.s.	0.920527
		nSyb>olf413 RNAi	Wilcoxon rank sum test	n.s.	0.400545
Figure 2E	nSyb>attP2 (control)	nSyb>bero RNAishRNA#2	Wilcoxon rank sum test	**	0.007681
	attP2 (w1118 background)	bero RNAishRNA#2 (w1118 background)	Wilcoxon rank sum test	n.s.	0.493989
	attP2 (Canton-S background)	bero RNAishRNA#2 (Canton-S background)	Wilcoxon rank sum test	n.s.	0.555802
	attP2 (yw background)	bero RNAishRNA#2 (yw background)	Wilcoxon rank sum test	n.s.	0.668015
Figure 2F	Canton-S (control)	beroKO/+ (CS background)	Wilcoxon rank sum test	***	0.000958
		beroKO/beroKO (CS background)	Wilcoxon rank sum test	**	0.001021

## Sheet: Figure_2A
Rolling latency (s)
nSyb>yv	nSyb>eys RNAi	nSyb>eys RNAi	nSyb>CG9336 RNAi	nSyb>luna RNAi	nSyb>Prosap RNAi	nSyb>CG14669 RNAi	nSyb>gukh RNAi	nSyb>Antp RNAi	nSyb>Erk7 RNAi	nSyb>5HT1A RNAi	nSyb>bc10 RNAi	nSyb>CG31760 RNAi	nSyb>CG4168 RNAi	nSyb>CG43897 RNAi	nSyb>bru3 RNAi	nSyb>Gyc88E RNAi	nSyb>olf413 RNAi
9.13	4.33	9.35	9.74	10.05	2.3	3.08	5.41	10.05	10.05	3.11	10.05	4.26	10.05	7.67	10.05	4.05	5.26
6.45	5.2	5.09	1.67	8.97	2.75	10.05	8.76	9.6	10.05	7.14	10.05	10.05	10.05	10.05	10.05	9.2	7.8
10.05	4.94	10.05	3.48	5.66	6.76	2.18	6.29	10.05	8.58	10.05	5.75	3.67	5.69	3	10.05	4.3	4.96
10.05	5.53	7.4	2.53	10.05	6.79	4.86	2.66	10.05	10.05	7.43	10.05	6.53	10.05	3.87	9.6	6.83	5.37
10.05	3.43	6.74	8.22	2.53	10.05	3.19	10.05	10.05	6.13	7.74	10.05	10.05	10.05	5.62	10.05	6.1	5.93
4.73	10.05	1.73	5.27	3.33	10.05	8.73	10.05	10.05	10.05	10.05	10.05	10.05	10.05	4.98	10.05	5.07	10.05
6.4	10.05	3.6	2.34	4.07	8.93	10.05	7.84	10.05	5.8	10.05	10.05	10.05	10.05	10.05	10.05	10.05	10.05
10.05	7.17	2.94	6	4	3.69	10.05	5.2	1.28	10.05	10.05	5.73	5.83	6.95	7.57	7.61	8.21	5.27
7.09	10.05	10.05	2.27	5.93	7.93	9.54	8.4	4.8	10.05	6.96	8.26	10.05	4.27	7.18	3.95	2.75	6.3
2.13	10.05	4.86	3.62	2.3	6.26	6.04	10.05	1.6	10.05	3.43	10.05	10.05	10.05	1	4.1	3.8	10.05
6	7.47	3.8	1.73	10.05	10.05	9.68	10.05	10.05	3.8	10.05	3.4	5.32	2.76	10.05	4.42	3.53	10.05
9.6	3.07	9	3.67	6.97	4.53	10.05	6.47	5.17	3.28	10.05	9.95	5.18	3.35	2.56	2.96	3.65	8.47
8.54	6.66	3.6	4.94	3.77	10.05	10.05	10.05	10.05	10.05	10.05	10.05	3.5	2.96	10.05	3.28	5.93	8.43
10.05	10.05	10.05	0.27	10.05	3.09	7	3.54	10.05	4.67	5.32	3.19	2.96	3.53	10.05	6.68	10.05	6.56
6.55	10.05	10.05	5.06	6.75	10.05	7.93	4.27	10.05	5.74	5.18	9.36	3.53	10.05	10.05	7.79	10.05	5.26
1.4	4.34	7.74	6.86	3.38	2.34	10.05	10.05	8.4	10.05	3.5	7.1	10.05	10.05	10.05	7.94	10.05	10.05
10.05	8.6	5.33	5.13	2.47	5.13	9.54	1.46	3.91	10.05	10.05	10.05	10.05	10.05	9.93	4.37	7.16	10.05
4.4	6.13	10.05	0.94	6.22	4.65	10.05	10.05	9.1	10.05	10.05	9.3	10.05	6.87	10.05	10.05	4.64	5.49
5.66	10.05	6.73	3.63	7.19	2.77	2.3	10.05	10.05	10.05	10.05	7.75	1	10.05	10.05	4.6	5.64	10.05
2.67	10.05	9.4	7.53	4.29	1.86	2.75	3.52	10.05	10.05	10.05	6.76	10.05	5.38	10.05	10.05	10.05	10.05
10.05	10.05	10.05	2.85	4.93	10.05	6.76	10.05	6.72	8.42	5.31	3.07	2.56	10.05	7.27	8.14	10.05	10.05
0.54	5.47	3.44	5.74	8.53	10.05	6.79	9.92	5.46	10.05	4.53	10.05	10.05	10.05	10.05	10.05	10.05	10.05
10.05	6.74	10.05	1.73	6.2	6.27	10.05	10.05	10.05	10.05	7.2	10.05	10.05	8.42	6.47	10.05	10.05	10.05
10.05	2.89	9.2	2.47	10.05	10.05	10.05	10.05	7.79	9.01	4.49	10.05	10.05	10.05	10.05	9.71	4.8	8.87
10.05	9.4	10.05	4.61	5.69	2.07	2.34	3.19	10.05	5.81	3.65	3.39	5.13	7.18	6.5	5.43	7.19	10.05
8.56	7.67	9.6	1.23	2.87	6.08	5.13	2.89	10.05	10.05	4.64	9.3	4.65	1	10.05	2.4	10.05	10.05
10.05	10.05	10.05	5.51	1.87	4.56	4.65	3.99	7.55	10.05	10.05	7.75	2.77	10.05	10.05	4	10.05	7.33
10.05	5.93	3.93	5.18	8.14	7.5	2.77	4.54	8.92	10.05	10.05	6.76	1.86	2.56	10.05	2.83	10.05	5.82
3.26	7.26	10.05	2.16	4.8	4.7	10.05	7.34	10.05	8.15	3.13	3.07	10.05	10.05	10.05	4.69	10.05	10.05
6.13	1.2	10.05	2.66	10.05	2.93	1.86	3.67	10.05	10.05	10.05	10.05	10.05	10.05	10.05	10.05	10.05	9.03
	10.05			5.8			3.1		10.05

## Sheet: Figure_2E
Rolling latency (s)
nSyb>attP2 (control)	nSyb>bero RNAishRNA#2	attP2 (w1118 background)	bero RNAishRNA#2 (w1118 background)	attP2 (Canton-S background)	bero RNAishRNA#2 (Canton-S background)	attP2 (yw background)	bero RNAishRNA#2 (yw background)
2.87	10.05	10.05	10.05	10.05	10.05	9.4	5.46
3.47	6.92	8.53	8.46	10.05	10.05	10.05	10.05
4.53	6.8	7.07	9.87	6.73	9.13	9.07	9.93
10.05	8.67	6.4	10.05	10.05	10.05	8.13	9.93
4.47	6.47	4.27	5.93	10.05	10.05	10.05	6.94
10.05	9.13	4.6	10.05	10.05	9.6	8.13	8.8
6.53	7.73	10.05	10.05	7.33	10.05	10.05	10.05
10.05	5.26	10.05	7.33	10.05	10.05	8.2	10.05
6.4	10.05	10.05	6.13	7.33	10.05	10.05	7
5.6	6.34	10.05	10.05	3.39	10.05	10.05	6.93
6.4	10.05	10.05	8.47	8.8	9.26	7.67	8.06
4.4	6.54	8.6	10.05	10.05	5.54	4.06	9.87
4.87	3.6	10.05	4.74	10.05	7.27	10.05	5.53
9.8	8.86	10.05	10.05	5.73	5.86	7.67	6.74
2.8	9	5.33	1.47	6.8	4.74	5.07	6.13
10.05	2.13	5.33	10.05	10.05	10.05	10.05	1.72
10.05	4.87	10.05	2.33	5.4	7.26	7.2	3.13
3.6	10.05	10.05	6.53	5.26	7.87	3.26	2.67
5.33	3.6	8.66	3.53	10.05	8.14	3.47	4.6
10.05	7.6	4.6	8.6	7.67	10.05	4.67	7.46
10.05	10.05	2.8	4.26	8.18	7.94	7.14	6.06
5.94	5.27	4.73	1.94	10.05	6.2	6.26	1.8
3.6	2.46	9.73	4.8	7.87	2.87	9.66	10.05
9.06	3.06	7.94	10.05	10.05	5	10.05	4.94
10.05	4.07	4.2	7.53	7.93	10.05	7.2	10.05
3.2	1.94	6.94	3.87	10.05	6.07	10.05	10.05
7.46	1.67	3.52	4.47	3.74	4.93	4.27	10.05
5.2	10.05	4.6	4.66	10.05	10.05	10.05	4.06
10.05	6.2	4.8	7.4	8.27	6.8	5.67	9.2
4.6	2.46	6.8	3.74	10.05	8.87	10.05	1.34
10.05	4.52	9.07	4.67	10.05	8.46	6.14	7.86
10.05	6.73	3.14	4.14	10.05	10.05	6.13	7.4
9.6	8.6	5.73	5.27	9.8	10.05	6.2	5.73
10.05	7.6	2.86	1.87	9.86	8.19	5.4	10.05
7.27	3.53	10.05	3.33	7.47	10.05	8.27	10.05
10.05	10.05	5.67	6	10.05	10.05	6.8	4.27
10.05	10.05	4.2	10.05	6.66	7.06	10.05	10.05
10.05	4.27	3.74	6.07	8.66	5.8	10.05	6.07
10.05	10.05	4.87	10.05	10.05	10.05	9.73	6.86
10.05	5.54	3.33	7	10.05	3.67	5	4.27
9.87	6.39	7.67	8.87	10.05	10.05	3.93	5.47
4.33	3.27	7.94	5.06	10.05	10.05	5.4	6.53
6.4	6.93	9.26	4.13	9.13	10.05	1.93	5.06
9.46	3.13	9.66	3.87	6.74	10.05	4.6	6.93
10.05	3.26	4.26	3.87	9.07	6.33	2.94	4.74
9.13	5.93	10.05	10.05	6.47	7	6.14	1.87
9.27	4.26	6.2	1.46	10.05	5.47	5.19	4.6
10.05	9.33	2.47	2.8	8.14	5.93	3.93	3.53
10.05	8.73	5.47	2.2	8.2	10.05	4.87	10.05
10.05	6.86	9.26	5.87	10.05	6.2	1.53	3.2
6.73	4.67	4.47	5.73	10.05	8.87	1.8	4.47
6	3.99	1.47	5.34	6.26	10.05	3.53	4.93
10.05	4.34	4	9.26	3.6	8.13	5.27	3.27
10.05	4.47	5.94	5.12	10.05	4.87	1.73	8.8
5.73	8.73	9.93	7.4	8.06	10.05	5.13	4.2
5.73	6.4	10.05	10.05	8.46	10.05
10.05	5.53	8.27	10.05	6.53	10.05
4.53	10.05	6.07	3.33	8.13	10.05
2.67	6.59	2.73	2.4	10.05	4.2
10.05	10.05	4.2	4.93	6.34	7.2
3.86	9.2	5.2
10.05	4	3
6.94	5.46	6.66
	6.07	10.05
	6.13

## Sheet: Figure_2F
Rolling latency (s)
Canton-S (control)	beroKO/+ (CS background)	beroKO/beroKO (CS background)
10.05	4.66	7.67
10.05	6.27	5.8
10.05	6.27	2.6
10.05	7.93	7.6
10.05	4.47	4.07
10.05	3.47	3.4
10.05	3.87	7.66
4.33	3.4	6.06
10.05	3.86	5.38
3.27	3.8	4.46
6.4	4.06	4
2.07	1.67	4.73
4.87	10.05	0.74
10.05	2.2	4.93
4.27	10.05	1.93
4.07	1.53	0.46
10.05	4.33	10.05
7	1.33	4.33
6.13	3.8	0.66
10.05	4.8	2.07
10.05	9.4	10.05
7.74	5.14	8.6
8.86	10.05	1.26
7	6.4	7.87
9.47	9.73	10.05
10.05	5.06	7.33
10.05	4.34	10.05
7.66	4.47	1.2
10.05	10.05	2.73
2.2	2.07	9.07
0.74	2	10.05
10.05	1.66	2.47
2.4	2	1.93
3.53	1.8	0.8
2.67	10.05	0.93
8.2	1.2	3.8
8.6	9.06	4.53
10.05	3.13
