# Supplementary material for: Belly roll, a GPI-anchored Ly6 protein, regulates Drosophila melanogaster escape behaviors by modulating the excitability of nociceptive peptidergic interneurons
Source: eLife journal article supplement (doi:10.7554/elife.83856), 2023-05-15
Supplement: fig2-figsupp1-data1 [file Summary table of genotypes, statistical testing and graph data for Figure 2-figure supplement 1.xlsx]

## Sheet: Genotypes
Figure	Abbreivation	Genotypes (Experimental Condition)
Figure 2 - figure supplement 1A	Control	w[*]/y[1] v[1]; CG9336[CPTI001654]/+; nSyb-GAL4(R56C10)/attP2
	nSyb>bero RNAishRNA#2	w[*]/y[1] v[1]; CG9336[CPTI001654]/+; nSyb-GAL4(R56C10)/UAS-bero[shRNA#2]
Figure 2 - figure supplement 1B	Control	w[*]/y[1] v[1]; CG9336[CPTI001654]/+; nSyb-GAL4(R56C10)/attP2
	nSyb>bero RNAishRNA#2	w[*]/y[1] v[1]; CG9336[CPTI001654]/+; nSyb-GAL4(R56C10)/UAS-bero[shRNA#2]
Figure 2 - figure supplement 1C	nSyb>attP2 (control)	y[1] w[1118]/y[1] v[1]; +/+; nSyb-GAL4/attP2
	nSyb>bero RNAiJF	y[1] w[1118]/y[1] v[1]; +/+; nSyb-GAL4/UAS-bero[JF03422]
	nSyb>bero RNAishRNA#1	y[1] w[1118]/y[1] v[1]; +/+; nSyb-GAL4/UAS-bero[shRNA#1]
	nSyb>bero RNAishRNA#2	y[1] w[1118]/y[1] v[1]; +/+; nSyb-GAL4/UAS-bero[shRNA#2]

## Sheet: Statistics
Figure	Genotypes or Experimental Condition (Abbreivation) compared		Statistical test	Significance	P values
	Control group	Experimental group
Figure 2 - figure supplement 1B	Control	nSyb>bero RNAishRNA#2	unpaired t test, two tailed ﻿with Welch's correction	*	0.0137058
Figure 2 - figure supplement 1C	nSyb>attP2 (control)	nSyb>bero RNAiJF	Wilcoxon rank sum test	*	0.023308
		nSyb>bero RNAishRNA#1	Wilcoxon rank sum test	**	0.002063
		nSyb>bero RNAishRNA#2	Wilcoxon rank sum test	****	9e-06

## Sheet: Figure 2 - figure supplement 1B
FBero-YFP/Fbackground
Control	nSyb>bero RNAishRNA#2
1.88674	0.94741
2.24822	1.20927
2.24849	1.33254
4.06497	1.53513
1.43235	1.13012
1.59283	1.32767
1.01211	1.71113
1.1921	1.21297
1.64339	1.19889
1.79012	1.94919
1.97303	2.12429
1.36616	2.15283
2.48028	1.51931
1.40421	1.85296
1.68888	1.36268
1.7922	1.16133
1.10957	1.95704
2.2464	2.61794
1.92984	1.80316
2.01689	1.22902
1.35547	0.778815
2.13946	0.755943
2.78936	0.979403
2.37394	0.837874

## Sheet: Figure 2 - figure supplement 1C
Rolling latency (s)
nSyb>attP2 (control)	nSyb>bero RNAiJF	nSyb>bero RNAishRNA#1	nSyb>bero RNAishRNA#2
2.14	1.87	0.54	4.34
3.67	0.4	0.54	1.6
4.8	1.73	0.87	2.2
3.93	10.05	2.8	2.8
3.87	1.06	1.06	1.34
0.66	2	1.86	0.27
5	8.93	5.06	2.33
4.94	0.74	1.07	1.47
2.67	3.74	0.53	1.87
2	0.6	2.33	0.73
5.94	2.94	1.67	0.8
2.4	0.66	2.87	0.93
2.2	6.06	0.34	0.2
1.73	3.07	0.73	2.94
1.4	4.13	0.47	0.93
2.73	0.54	0.8	1.8
4.47	0.27	3.06	0.87
3.66	0.27	0.87	0.46
8.74	0.2	0.47	1.6
0.73	2.6	0.73	0.26
0.4	0.73	0.67	0.33
3.07	4	0.6	1.13
2.8	4	4.67	0.26
9.14	5.07	1.26	0.47
4.8	0.46	1	0.33
1	3.07	6.4	0.46
3.06	0.34	5.34	0.6
10.05	2.27	1.26	0.67
2.4	3.47	1.93	0.54
0.47	0.73	1.86	0.4
0.8	1.67	0.54	0.47
2.54	0.86	2.26	1.4
0.47	0.67	1.46	1.14
3.07	0.54	1.53	1.74
0.67	0.46	1.4	1.47
1.87	3.4	0.26
	0.86
	1.47
	0.6
	1.54
