# Supplementary material for: Belly roll, a GPI-anchored Ly6 protein, regulates Drosophila melanogaster escape behaviors by modulating the excitability of nociceptive peptidergic interneurons
Source: eLife journal article supplement (doi:10.7554/elife.83856), 2023-05-15
Supplement: fig2-figsupp2-data1 [file Summary table of genotypes and graph data for Figure 2-figure supplement 2.xlsx]

## Sheet: Genotypes
Figure	Abbreivation	Genotypes (Experimental Condition)
Figure 2 - figure supplement 2A	representative lines of DGRP	Bloomington_Stock_ID	strain
		25174	DGRP-208
		25175	DGRP-301
		25177	DGRP-304
		25179	DGRP-307
		25180	DGRP-313
		25181	DGRP-315
		25182	DGRP-324
		25183	DGRP-335
		25184	DGRP-357
		25185	DGRP-358
		25186	DGRP-360
		25187	DGRP-362
		25445	DGRP-365
		25188	DGRP-375
		25189	DGRP-379
		25190	DGRP-380
		25192	DGRP-399
		25193	DGRP-427
		25194	DGRP-437
		25195	DGRP-486
		25197	DGRP-517
		25198	DGRP-555
		25199	DGRP-639
		25744	DGRP-705
		25200	DGRP-707
		25201	DGRP-712
		25745	DGRP-714
		25202	DGRP-730
		25203	DGRP-732
		25204	DGRP-765
		25205	DGRP-774
		25206	DGRP-786
		25207	DGRP-799
		25208	DGRP-820
		25209	DGRP-852
		25210	DGRP-859
Figure 2 - figure supplement 2B	bero KO	bero[KO]/bero[KO] (Canton-S background)
	CS(RT+)	Canton-S
	#208	DGRP-208
	#315	DGRP-315
	#391	DGRP-391
	#705	DGRP-705
	CS(RT-)	Canton-S

## Sheet: Figure 2 - figure supplement 2A
strain	rolling probability in 5s (%)	median latency (s)	2L_20859945_SNP
DGRP-208	76.67	2.83	C
DGRP-301	16.67	9.99	C
DGRP-304	36.67	6.84	T
DGRP-307	46.67	6.64	T
DGRP-313	20	9.86	T
DGRP-315	73.33	2.94	C
DGRP-324	33.33	8.14	T
DGRP-335	33.33	5.62	T
DGRP-357	56.67	4.5	C
DGRP-358	19.35	10.05	T
DGRP-360	33.33	6.79	T
DGRP-362	56.67	4	C
DGRP-365	50	5.53	C
DGRP-375	50	5.3	T
DGRP-379	40	8.3	T
DGRP-391	16.67	10.05	T
DGRP-399	33.33	7.65	T
DGRP-427	23.33	6.21	T
DGRP-437	16.67	8.7	T
DGRP-486	36.67	6.8	C
DGRP-517	66.67	3.27	C
DGRP-555	67.74	3.93	C
DGRP-639	53.33	4.37	C
DGRP-705	13.33	10.05	T
DGRP-707	53.33	4.27	C
DGRP-712	60	4.44	C
DGRP-714	56.67	3.53	C
DGRP-730	35.48	10.05	T
DGRP-732	66.67	3.4	T
DGRP-765	30	7.9	T
DGRP-774	20	8.74	T
DGRP-786	30	9.26	C
DGRP-799	32.26	8.87	T
DGRP-820	40	6.27	T
DGRP-852	43.33	5.41	T
DGRP-859	40	6.94	C

## Sheet: Figure 2 - figure supplement 2B
		Area	Mean signal	Mean-background signal	normalized expression (bero/αTub84B)	2L_20859945_SNP
αTub84B	bero KO	1715	62.552	12.083	N/A	N/A
	CS(RT+)	1715	61.614	11.145	N/A	T
	#208	1715	60.76	10.291	N/A	C
	#315	1715	61.578	11.109	N/A	C
	#391	1715	59.823	9.354	N/A	T
	#705	1715	60.569	10.1	N/A	T
	CS(RT-, background)	1715	50.469	N/A	N/A	N/A
bero	bero KO	1715	42.373	0	0	N/A
	CS(RT+)	1715	67.476	19.502	1.74984	T
	#208	1715	57.591	9.617	0.934506	C
	#315	1715	73.128	25.154	2.26429	C
	#391	1715	79.114	31.14	3.32906	T
	#705	1715	84.297	36.323	3.88315	T
	CS(RT-, background)	1715	47.974	N/A	N/A	N/A
