# Supplementary material for: Belly roll, a GPI-anchored Ly6 protein, regulates Drosophila melanogaster escape behaviors by modulating the excitability of nociceptive peptidergic interneurons
Source: eLife journal article supplement (doi:10.7554/elife.83856), 2023-05-15
Supplement: fig3-data1 [file Summary table of genotypes, statistical testing and graph data for Figure 3.xlsx]

## Sheet: Genotypes
Figure	Abbreivation	Genotypes (Experimental Condition)
Figure 3A	Bero-YFP, dimm+ neurons	w[*]/w[*]; CG9336[CPTI001654]/dimm[929]; UAS-CD4-tdTomato/+
	Bero-YFP, Eh+ neurons	w[*]/w[*]; CG9336[CPTI001654]/GAL4-Eh.2.4; UAS-CD4-tdTomato/+
	Bero-YFP, Ilp+ neurons	w[*]/w[*]; CG9336[CPTI001654]/Ilp2-GAL4.R; UAS-CD4-tdTomato/+
	Bero-YFP, Lk+ neurons	w[*]/w[*]; CG9336[CPTI001654]/Lk-GAL4.TH; UAS-CD4-tdTomato/+
Figure 3C	Lk peptide,Lk>CD4-RFP, Bero-YFP	w[*]/w[*]; CG9336[CPTI001654]/Lk-GAL4.TH; UAS-CD4-tdTomato/+, Rabbit polyclonal anti-Lk
Figure 3D	ABLK>syt:eGFP, DenMark	y[1] v[1]/y[1] w[1118]; Lk-GAL4, tsh-LexA/tubP-FRT-GAL80-FRT; LexAop-FLP.L/UAS-syt.eGFP, UAS-DenMark
Figure 3E	Lk>attP2 (control)	w[1118]/y[1] v[1]; Lk-GAL4/+; attP2/+
	Lk>bero RNAishRNA#2	w[1118]/y[1] v[1]; Lk-GAL4/+; UAS-bero[shRNA#2]/+
	Eh>attP2 (control)	w[*]/y[1] v[1]; Eh.2.4-GAL4/+; attP2/+
	Eh>bero RNAishRNA#2	w[*]/y[1] v[1]; Eh.2.4-GAL4/+; UAS-bero[shRNA#2]/+
	Ilp2>attP2 (control)	w[*]/y[1] v[1]; Ilp2-GAL4.R/+; attP2/+
	Ilp2>bero RNAishRNA#2	w[*]/y[1] v[1]; Ilp2-GAL4.R/+; UAS-bero[shRNA#2]/+
Figure 3F	ABLK>myr:GFP (Control)	w[*]/y[1] v[1]; Lk-GAL4, tsh-LexA/tubP-FRT-GAL80-FRT; LexAop-FLP.L/UAS-myr:GFP
	ABLK>Bero:FLAG	w[*]/y[1] v[1]; Lk-GAL4, tsh-LexA/tubP-FRT-GAL80-FRT; LexAop-FLP.L/UAS-Bero:FLAG
	myr:GFP (yv background)	w[*]/y[1] v[1]; tubP-FRT-GAL80-FRT/+; UAS-myr:GFP/+
	Bero:FLAG (yv background)	w[*]/y[1] v[1]; tubP-FRT-GAL80-FRT/+; UAS-Bero:FLAG/+

## Sheet: Statistics
Figure	Genotypes or Experimental Condition (Abbreivation) compared		Statistical test	Significance	P values
	Control group	Experimental group
Figure 3D	Lk>attP2 (control)	Lk>bero RNAishRNA#2	Wilcoxon rank sum test	***	0.000196
	Eh>attP2 (control)	Eh>bero RNAishRNA#2	Wilcoxon rank sum test	n.s.	0.639989
	Ilp2>attP2 (control)	Ilp2>bero RNAishRNA#2	Wilcoxon rank sum test	n.s.	0.840573
Figure 3E	ABLK>myr:GFP (Control)	ABLK>Bero:FLAG	Wilcoxon rank sum test	**	0.001916
	myr:GFP (yv background)	Bero:FLAG (yv background)	Wilcoxon rank sum test	n.s.	0.119074

## Sheet: Figure_3D
Rolling latency (s)
Lk>attP2 (control)	Lk>bero RNAishRNA#2	Eh>attP2 (control)	Eh>bero RNAishRNA#2	Ilp2>attP2 (control)	Ilp2>bero RNAishRNA#2
6.87	10.05	8.74	5.53	10.05	3.07
7.53	5.53	4.65	5.27	10.05	6.73
10.05	5.93	10.05	10.05	7.27	4
10.05	5.73	3.8	5.2	2.27	9.73
7.73	4	7.27	10.05	8	6.4
8.74	2.6	10.05	5.13	6.2	9
6.87	8.53	10.05	4.33	5.14	5.6
6.8	3.54	4.12	5.06	4.4	3.27
3.13	9.53	1.93	4.07	2.67	4.07
9.4	4.2	5.47	6.13	5	5
10.05	4.33	5.66	5.47	8.67	5.47
10.05	2.34	4.86	7.33	7.27	4.47
6	4.87	4.94	10.05	6.2	10.05
10.05	5.27	10.05	9.74	5.39	6
6.07	10.05	5.27	1.93	9.8	3.8
3.74	10.05	10.05	6	5.13	6.4
10.05	8.54	4.8	3.87	5.33	3.66
10.05	4.2	3.94	3.2	3.33	5.07
3.34	8.34	3.53	10.05	4.14	3.74
7.07	4.8	5.8	10.05	7.54	8.14
10.05	4.33	6.05	4.86	5.67	5.93
5.6	4.2	10.05	3.4	4.93	7.67
10.05	3.33	7.26	6.26	5.47	4.8
8.13	3.47	7.26	10.05	7.06	3
10.05	7.73	5.33	2.67	5	5
3.53	3.94	5.93	3.87	5.26	10.05
6.86	5.67	4.8	8.14	3.47	10.05
5.33	6.13	4.14	7.66	9.13	6.94
10.05	6.94	3.6	7.73	7	5.46
10.05	8.66	6.67	7.53	7.87	5.33
10.05	5.47	6.6	3.86	3.2	3.06
3.53	6	10.05	2.53	6.8	6.4
6.53	7.13	4.8	10.05	5.4	7.07
10.05	10.05	10.05	4.33	10.05	7.33
10.05	10.05	5.2	7.33	5.6	5.87
3.4	10.05	5.46	8.47	5.27	7.07
6.46	4.93	5.53	5	4.8	6.73
10.05	4	1.6	2.87	10.05	4.53
10.05	1.13		5	2.86	10.05
10.05	8.46		2.46		5
10.05	3.73		2.2
8.6	4.2
2.94	10.05
2.93	7.2
8.8	2.39
6.73	5
10.05	5.46
9.14	7.07
4.6	2.27
7.58	6.27
5.27	5.2
10.05	7.33
9.07	4
6.52	5.2
8.6	3.73
9.07	4.8
4.94	6.66
8	7.07
10.05	5.73
6.27	4.47
5.87	10.05
9.4	4.14
7.86	3.07
10.05	8.8
10.05	7.25
7.12	10.05
4.53	0.66
5.87	10.05
6.93	10.05
4	10.05
10.05	10.05
10.05	5.4
7.47	1.07
5.66
10.05

## Sheet: Figure_3E
Rolling latency (s)
ABLK>myr:GFP (Control)	ABLK>Bero:FLAG	myr:GFP (yv background)	Bero:FLAG (yv background)
5	9.14	3.4	3.46
4.06	6.87	4.46	3.4
4.67	8.34	3.4	8.59
9.4	8.66	4.53	2.33
4.8	8.34	4.27	3.66
1.4	10.05	7.33	9.8
4.6	9.06	5.14	5.8
5.13	4.4	10.05	6.34
7.34	10.05	3.73	5.4
5.54	7.86	4.8	3.93
8.06	6.33	8.33	6.6
5.53	9.87	10.05	4.46
3.8	4.6	2.67	3.87
10.05	7.27	3.94	1.73
3.6	7.13	3.2	0.94
7.2	9.8	4.4	2.87
3.6	2.46	5.6	3.93
2.87	10.05	10.05	1.07
3.86	4.26	5.47	5.06
7.74	4.66	3.6	6.46
3.87	3.97	10.05	2.07
10.05	7.07	4.6	4.87
4.93	10.05	5.8	3.4
6.93	9.14	5.87	1.07
1.45	4.6	4.2	8.2
1.6	6.47	3.2	5.13
10.05	9.07	3.87	3.2
5	7.46	1.8	10.05
8.26	10.05	10.05	3.87
3.26	10.05	3.72	4.74
3.13	8.13	3.14	2.87
7.26	2.8	2.13	1.67
10.05	10.05	6.13	5.94
5.2	10.05	3.67	10.05
5	6.34	2.86	5.4
4.67	10.05	7.26	8.73
6.4	7.47	6.74	5.27
5.79	4.8	10.05	3.13
6.4	2.26	6.73	2.74
6.47	4.47	3.86	4
5.2	5.53	4.73	2.67
6.73	7.13	0.8	6.66
4.86	10.05	4.26	2.12
10.05	4.94	9.94	4.53
3.87	7.47	5.46	3.6
4.73	9.26	6.93	2.27
7.46	6	1.14	2.14
3.27	6.2	3.93	10.05
10.05	10.05	2.94	6.6
10.05	4.54	3.26	1.93
3.66	4.53	10.05	4.2
5.66	4.8	6.85	10.05
4.06	5.14	10.05	4.4
7.34	7.07	3.8	5.2
3.87	10.05	3.07	5.4
2.93	10.05	8.33	8.53
1.8	4.33	7.73	5.27
3.33	10.05	8.34	3.74
4.67	5.13	4.33	4.27
1.33	7	4.13	3.67
10.05	3.4		3.07
5.14	3.53
6.14	8.73
8.73	10.05
10.05	6.2
2.6	6
8.8	10.05
4.6	6.54
8.27	10.05
8.65	3.14
10.05	10.05
6.8	10.05
6.67
