# Supplementary material for: Belly roll, a GPI-anchored Ly6 protein, regulates Drosophila melanogaster escape behaviors by modulating the excitability of nociceptive peptidergic interneurons
Source: eLife journal article supplement (doi:10.7554/elife.83856), 2023-05-15
Supplement: fig3-figsupp1-data1 [file Summary table of genotypes, statistical testing and graph data for Figure 3-figure supplement 1.xlsx]

## Sheet: Genotypes
Figure	Abbreivation	Genotypes (Experimental Condition)
Figure 3 - figure supplement 1A	Bero-YFP, ClassIV neurons	w[*]/w[*]; CG9336[CPTI001654]/+; UAS-CD4-tdTomato/ppk-GAL4
	Bero-YFP, Basin neurons	w[*]/w[*]; CG9336[CPTI001654]/+; UAS-CD4-tdTomato/R72F11-GAL4
	Bero-YFP, Goro neurons	w[*]/w[*]; CG9336[CPTI001654]/+; UAS-CD4-tdTomato/R69F06-GAL4
Figure 3 - figure supplement 1B	ClassIV>attP2 (control)	w[*]/y[1] v[1]; +/+; ppk-GAL4/attP2
	ClassIV>bero RNAishRNA#2	w[*]/y[1] v[1]; +/+; ppk-GAL4/UAS-bero[shRNA#2]
	Basin>attP2 (control)	w[1118]/y[1] v[1]; +/+; Basin-GAL4(R72F11)/attP2
	Basin>bero RNAishRNA#2	w[1118]/y[1] v[1]; +/+; Basin-GAL4(R72F11)/UAS-bero[shRNA#2]
	Goro>attP2 (control)	w[1118]/y[1] v[1]; +/+; Goro-GAL4(R69F06)/attP2
	Goro>bero RNAishRNA#2	w[1118]/y[1] v[1]; +/+; Goro-GAL4(R69F06)/UAS-bero[shRNA#2]
Figure 3 - figure supplement 1C	ABLK>UAS-Bero:FLAG	w[*]/y[1] v[1]; Lk-GAL4, tsh-LexA/tubP-FRT-GAL80-FRT; LexAop-FLP.L/UAS-Bero:FLAG, Mouse monoclonal anti-FLAG

## Sheet: Statistics
Figure	Genotypes or Experimental Condition (Abbreivation) compared		Statistical test	Significance	P values
	Control group	Experimental group
Figure 3 - figure supplement 1B	ClassIV>attP2 (control)	ClassIV>bero RNAishRNA#2	Wilcoxon rank sum test	n.s.	0.549408
	Basin>attP2 (control)	Basin>bero RNAishRNA#2	Wilcoxon rank sum test	n.s.	0.90921
	Goro>attP2 (control)	Goro>bero RNAishRNA#2	Wilcoxon rank sum test	n.s.	0.710511

## Sheet: Figure 3 - figure supplement 1B
Rolling latency (s)
ClassIV>attP2 (control)	ClassIV>bero RNAishRNA#2	Basin>attP2 (control)	Basin>bero RNAishRNA#2	Goro>attP2 (control)	Goro>bero RNAishRNA#2
3.27	3.74	9.53	3.8	7.8	8.67
4.87	3.73	10.05	10.05	7.73	10.05
7.53	2.73	10.05	4.92	8	10.05
4.8	3.2	10.05	10.05	10.05	10.05
4.07	7.8	10.05	7.87	10.05	10.05
6	4.06	8.4	4.86	8.2	3.67
6.07	5.8	7.6	10.05	10.05	10.05
4.73	10.05	10.05	7.93	10.05	9.2
5.73	6.6	4.93	10.05	10.05	4.8
10.05	6.2	9.73	10.05	10.05	8.53
4.06	3.13	10.05	10.05	10.05	10.05
10.05	3.2	6.26	9.66	10.05	10.05
9.8	4.2	10.05	10.05	8.46	7.74
8.06	10.05	7.13	5.26	10.05	10.05
4.8	5.4	10.05	10.05	5.87	7.47
6.07	5.94	10.05	10.05	7.2	10.05
8.14	8.46	10.05	10.05	8.13	6
5.47	4.07	10.05	10.05	5.93	4.74
4.53	4.06	10.05	10.05	10.05	3.66
4.2	5.2	10.05	10.05	6.53	10.05
3.87	3.94	10.05	10.05	10.05	7.07
10.05	4.46	10.05	10.05	6.8	10.05
5.66	4.54	2.07	8.8	7.86	9.47
4.47	5.2	10.05	10.05	5.73	6.67
6.87	8	7.67	8.8	10.05	10.05
2.67	5.33	7.67	10.05	4.46	6.54
9.74	2.66	10.05	10.05	10.05	5.2
5.06	3.26	10.05	7.07	7.13	5.47
7.34	5.8	10.05	4.2	7.4	9.67
3.66	2.73	10.05	7.74	7.8	8.6
2.2	8.46	10.05	10.05	6.6	6.53
6.87	7.94	4.87	6.4	9.86	10.05
6.8	3.67	6.8	6.54	9.93	9.73
9.67	5	4.39	5.33	5.33	3.74
3.67	4.07	5.47	10.05	9.4	5.8
3.6	5.47	10.05	4.67	10.05	7.53
8.66	8.27	10.05	10.05	4.47	7.93
3.94	5.6	3.87	10.05	4.94	10.05
3.54	6.06	7.72	3.26	3.47	5.8
5.8	7.2	4.4			1.8
5.07	4.47
3.47	9
2.74	4.47
4.6
