# Supplementary material for: Belly roll, a GPI-anchored Ly6 protein, regulates Drosophila melanogaster escape behaviors by modulating the excitability of nociceptive peptidergic interneurons
Source: eLife journal article supplement (doi:10.7554/elife.83856), 2023-05-15
Supplement: fig4-data1 [file Summary table of genotypes, statistical testing and graph data for Figure 4.xlsx]

## Sheet: Genotypes
Figure	Abbreivation	Genotypes (Experimental Condition)
Figure 4A	Control	y[1] w[*]/y[1] v[1]; TrpA1-QF, QUAS-ChR2.T159C-HA/Lk-GAL4, UAS-CD4-tdGFP; UAS-jRCaMP1b, P{}attP2/+
	LK>bero RNAi	y[1] w[*]/y[1] v[1]; TrpA1-QF, QUAS-ChR2.T159C-HA/Lk-GAL4, UAS-CD4-tdGFP; UAS-jRCaMP1b, P{VALIUM20-bero[shRNA#2]}attP2/+
Figure 4B	Control	y[1] w[*]/y[1] v[1]; TrpA1-QF, QUAS-ChR2.T159C-HA/Lk-GAL4, UAS-CD4-tdGFP; UAS-jRCaMP1b, P{}attP2/+
	LK>bero RNAi	y[1] w[*]/y[1] v[1]; TrpA1-QF, QUAS-ChR2.T159C-HA/Lk-GAL4, UAS-CD4-tdGFP; UAS-jRCaMP1b, P{VALIUM20-bero[shRNA#2]}attP2/+
Figure 4C	Control, ATR(+)	y[1] w[*]/y[1] v[1]; TrpA1-QF, QUAS-ChR2.T159C-HA/Lk-GAL4, UAS-CD4-tdGFP; UAS-jRCaMP1b, P{}attP2/+, ATR(+)
	LK>bero RNAi, ATR(+)	y[1] w[*]/y[1] v[1]; TrpA1-QF, QUAS-ChR2.T159C-HA/Lk-GAL4, UAS-CD4-tdGFP; UAS-jRCaMP1b, P{VALIUM20-bero[shRNA#2]}attP2/+, ATR(+)
Figure 4D	Control, ATR(+)	y[1] w[*]/y[1] v[1]; TrpA1-QF, QUAS-ChR2.T159C-HA/Lk-GAL4, UAS-CD4-tdGFP; UAS-jRCaMP1b, P{}attP2/+, ATR(+)
	LK>bero RNAi, ATR(+)	y[1] w[*]/y[1] v[1]; TrpA1-QF, QUAS-ChR2.T159C-HA/Lk-GAL4, UAS-CD4-tdGFP; UAS-jRCaMP1b, P{VALIUM20-bero[shRNA#2]}attP2/+, ATR(+)
Figure 4E	Control, ATR(−)	y[1] w[*]/y[1] v[1]; TrpA1-QF, QUAS-ChR2.T159C-HA/Lk-GAL4, UAS-CD4-tdGFP; UAS-jRCaMP1b, P{}attP2/+, ATR(−)
	LK>bero RNAi, ATR(−)	y[1] w[*]/y[1] v[1]; TrpA1-QF, QUAS-ChR2.T159C-HA/Lk-GAL4, UAS-CD4-tdGFP; UAS-jRCaMP1b, P{VALIUM20-bero[shRNA#2]}attP2/+, ATR(−)
Figure 4F	Control, ATR(−)	y[1] w[*]/y[1] v[1]; TrpA1-QF, QUAS-ChR2.T159C-HA/Lk-GAL4, UAS-CD4-tdGFP; UAS-jRCaMP1b, P{}attP2/+, ATR(−)
	Control, ATR(+)	y[1] w[*]/y[1] v[1]; TrpA1-QF, QUAS-ChR2.T159C-HA/Lk-GAL4, UAS-CD4-tdGFP; UAS-jRCaMP1b, P{}attP2/+, ATR(+)
	LK>bero RNAi, ATR(−)	y[1] w[*]/y[1] v[1]; TrpA1-QF, QUAS-ChR2.T159C-HA/Lk-GAL4, UAS-CD4-tdGFP; UAS-jRCaMP1b, P{VALIUM20-bero[shRNA#2]}attP2/+, ATR(−)
	LK>bero RNAi, ATR(+)	y[1] w[*]/y[1] v[1]; TrpA1-QF, QUAS-ChR2.T159C-HA/Lk-GAL4, UAS-CD4-tdGFP; UAS-jRCaMP1b, P{VALIUM20-bero[shRNA#2]}attP2/+, ATR(+)

## Sheet: Statistics
Figure	Genotypes or Experimental Condition (Abbreivation) compared		Statistical test	Significance	P values
	Control group	Experimental group
Figure 4B	Control	Lk>bero RNAi	Wilcoxon rank sum test	****	<0.0001
Figure 4F	Control, ATR(−)	Control, ATR(+)	Kruskal-Wallis test followed by Dunn’s test	n.s.	0.0646
	Lk>bero RNAi, ATR(−)	Lk>bero RNAi, ATR(+)	Kruskal-Wallis test followed by Dunn’s test	****	<0.0001
	Control, ATR(+)	Lk>bero RNAi, ATR(+)	Kruskal-Wallis test followed by Dunn’s test	****	<0.0001

## Sheet: Figure_4B
AUC (% ·s)
Control	Lk>bero RNAi
1652.51	319.492
1673.2	415.747
2117.48	679.437
3255.71	296.961
2166.98	315.69
1974.51	560.169
2543.1	854.203
2480.16	411.628
905.328	452.422
2231	442.962
2354.28	367.384
781.239	417.57
639.112	520.978
586.942	434.289
2552.67	539.966
2081.21	580.603
2475.31	456.044
1428.49	480.059
1946.09	653.137
1232.97	504.95
782.1	485.254
1397.44	706.549
982.945	552.513
860.226	674.459
	546.45

## Sheet: Figure_4F
ΔFmax/F0 (%)
Control, ATR(−)	Control, ATR(+)	Lk>bero RNAi, ATR(−)	Lk>bero RNAi, ATR(+)
8.68499	25.9189	3.22769	34.2866
23.3099	15.44	1.6536	46.3151
20.1077	9.67408	4.15738	69.8744
12.1398	0.716668	4.00267	230.469
5.91314	5.27647	3.7712	111.1
18.2759	2.93481	8.14157	12.418
15.1656	4.07318	4.90347	29.442
22.2978	28.3683	4.45834	31.0899
4.26891	7.74841	3.72249	182.464
10.8596	3.71063	5.60962	97.9381
16.6296	6.82069	2.83521	32.712
24.3467	8.24064	4.73563	25.7881
11.0003	11.1166	6.74231	89.4406
7.64343	5.2557	2.81097	105.657
6.47387	3.10694	4.08796	71.2069
34.3968	14.99	2.54408	24.8132
17.8688	11.1318	7.28339	27.4719
19.1651	7.37504	3.44244	64.5334
19.5961	25.029	3.35843	92.1681
18.5809	3.61209	-0.355296	65.7447
7.55735	19.2789	2.56521	29.1144
22.9676	9.77138	2.29294	47.8032
19.3618	4.32989	6.89144	76.0696
16.1743	7.61001	3.99058	32.6887
	10.0048	0.474831	0.557284
	14.4556		14.393
	31.5309		33.708
	21.6059
	22.7578
