# Supplementary material for: Belly roll, a GPI-anchored Ly6 protein, regulates Drosophila melanogaster escape behaviors by modulating the excitability of nociceptive peptidergic interneurons
Source: eLife journal article supplement (doi:10.7554/elife.83856), 2023-05-15
Supplement: fig4-figsupp1-data1 [file Summary table of genotypes for Figure 4-figure supplement 1.xlsx]

## Sheet: Genotypes
Figure	Abbreivation	Genotypes (Experimental Condition)
Figure 4 - figure supplement 1A	Control	y[1] w[*]/y[1] v[1]; TrpA1-QF, QUAS-ChR2.T159C-HA/Lk-GAL4, UAS-CD4-tdGFP; UAS-jRCaMP1b, P{}attP2/+
	LK>bero RNAi	y[1] w[*]/y[1] v[1]; TrpA1-QF, QUAS-ChR2.T159C-HA/Lk-GAL4, UAS-CD4-tdGFP; UAS-jRCaMP1b, P{VALIUM20-bero[shRNA#2]}attP2/+
Figure 4 - figure supplement 1B	Control, ATR(+)	y[1] w[*]/y[1] v[1]; TrpA1-QF, QUAS-ChR2.T159C-HA/Lk-GAL4, UAS-CD4-tdGFP; UAS-jRCaMP1b, P{}attP2/+, ATR(+)
	Control, ATR(−)	y[1] w[*]/y[1] v[1]; TrpA1-QF, QUAS-ChR2.T159C-HA/Lk-GAL4, UAS-CD4-tdGFP; UAS-jRCaMP1b, P{}attP2/+, ATR(−)
	LK>bero RNAi, ATR(+)	y[1] w[*]/y[1] v[1]; TrpA1-QF, QUAS-ChR2.T159C-HA/Lk-GAL4, UAS-CD4-tdGFP; UAS-jRCaMP1b, P{VALIUM20-bero[shRNA#2]}attP2/+, ATR(+)
	LK>bero RNAi, ATR(−)	y[1] w[*]/y[1] v[1]; TrpA1-QF, QUAS-ChR2.T159C-HA/Lk-GAL4, UAS-CD4-tdGFP; UAS-jRCaMP1b, P{VALIUM20-bero[shRNA#2]}attP2/+, ATR(−)
