# Supplementary material for: Belly roll, a GPI-anchored Ly6 protein, regulates Drosophila melanogaster escape behaviors by modulating the excitability of nociceptive peptidergic interneurons
Source: eLife journal article supplement (doi:10.7554/elife.83856), 2023-05-15
Supplement: fig4-figsupp2-data1 [file Summary table of genotypes, statistical testing and graph data for Figure 4-figure supplement 2.xlsx]

## Sheet: Genotypes
Figure	Abbreivation	Genotypes (Experimental Condition)
Figure 4 - figure supplement 2A	Control	y[1] w[*]/y[1] v[1]; +/Lk-GAL4, UAS-CD4-tdGFP; attP2/+
	LK>bero RNAi	y[1] w[*]/y[1] v[1]; +/Lk-GAL4, UAS-CD4-tdGFP; UAS-bero[shRNA#2]/+
Figure 4 - figure supplement 2B	Control	y[1] w[*]/y[1] v[1]; +/Lk-GAL4, UAS-CD4-tdGFP; attP2/+
	LK>bero RNAi	y[1] w[*]/y[1] v[1]; +/Lk-GAL4, UAS-CD4-tdGFP; UAS-bero[shRNA#2]/+
Figure 4 - figure supplement 2C	Control	y[1] w[*]/y[1] v[1]; +/Lk-GAL4, UAS-CD4-tdGFP; attP2/+
	LK>bero RNAi	y[1] w[*]/y[1] v[1]; +/Lk-GAL4, UAS-CD4-tdGFP; UAS-bero[shRNA#2]/+

## Sheet: Statistics
Figure	Genotypes or Experimental Condition (Abbreivation) compared		Statistical test	Significance	P values
	Control group	Experimental group
Figure 4 - figure supplement 2B	Control	LK>bero RNAi	Wilcoxon rank sum test	n.s.	0.5101
Figure 4 - figure supplement 2C	Control	LK>bero RNAi	Wilcoxon rank sum test	n.s.	0.7002
	Control	LK>bero RNAi	Wilcoxon rank sum test	n.s.	0.9053

## Sheet: Figure 4 - figure supplement 2B
Average velocity (mm/s)
Control	LK>bero RNAi
0.390443	0.945967
0.815678	0.652812
0.67072	1.044
0.785124	0.744716
0.655135	0.755425
0.459159	0.720207
0.75068	0.869062
0.705808	1.01917
0.673031	0.839424
0.769683	0.64224
1.00367	0.879286
0.808646	0.620009
0.801968	0.585641
0.852461	0.718131
0.605006	0.0752887
0.756954	0.809929
0.600023	0.735658
	0.353364
	0.77811
	0.786454
	0.693784
	0.833046

## Sheet: Figure 4 - figure supplement 2C
Moving forward frames/Total frames (%)			Head casting frames/Total frames (%)
Control	LK>bero RNAi		Control	LK>bero RNAi
48.3889	63.1111		12.8889	25.5
68.5	53.4444		13.7222	23.7778
49.8889	65.9444		38.2222	23.1111
61.5	62.1111		24.1667	18.9444
55.5	57.6667		21.3333	24.3333
48.0556	47		18.1111	36.1111
69.4444	61.9444		8.77778	24.5556
62.5	68.8889		19.0556	20.8889
53.1111	60.5		29.7778	23.6667
57.7222	55.9444		24.7222	23.7778
74.5	66.5556		13.1667	17.8889
75.4444	57.5		2.94444	19
57.3889	54.7778		28.7222	18.3889
68	61.9444		18.6667	19.5556
44.9444	94.6667		38	2.11111
71.5556	72.5556		10.4444	8.55556
56.6111	60.4444		21.4444	20.6667
	50.6667			1.88889
	62			17
	70.6111			8.77778
	53.7222			21.7222
	60			24
