# Supplementary material for: Belly roll, a GPI-anchored Ly6 protein, regulates Drosophila melanogaster escape behaviors by modulating the excitability of nociceptive peptidergic interneurons
Source: eLife journal article supplement (doi:10.7554/elife.83856), 2023-05-15
Supplement: fig5-data1 [file Summary table of genotypes, statistical testing and graph data for Figure 5.xlsx]

## Sheet: Genotypes
Figure	Abbreivation	Genotypes (Experimental Condition)
Figure 5A	Lk>CsChrimson, ATR(+)	w[1118]; Lk-GAL4/UAS-CsChrimson.mVenus; +/+, ATR (+)
	Lk>CsChrimson, ATR(−)	w[1118]; Lk-GAL4/UAS-CsChrimson.mVenus; +/+, ATR (−)
	ABLK>CsChrimson, ATR(+)	w[*]/y[1] v[1]; Lk-GAL4, tsh-LexA/tubP-FRT-GAL80-FRT; LexAop-FLP.L/UAS-CsChrimson.mVenus, ATR (+)
	ABLK>CsChrimson, ATR(−)	w[*]/y[1] v[1]; Lk-GAL4, tsh-LexA/tubP-FRT-GAL80-FRT; LexAop-FLP.L/UAS-CsChrimson.mVenus, ATR (−)
	SELK>CsChrimson, ATR(+)	w[*]/y[1] v[1]; Lk-GAL4, LexAop-FLP/tubP-FRT-GAL80-FRT; Scr-LexA/UAS-CsChrimson.mVenus, ATR (+)
	SELK>CsChrimson, ATR(−)	w[*]/y[1] v[1]; Lk-GAL4, LexAop-FLP/tubP-FRT-GAL80-FRT; Scr-LexA/UAS-CsChrimson.mVenus, ATR (−)
Figure 5B	Lk>CsChrimson.mVenus	w[1118]; Lk-GAL4/UAS-CsChrimson.mVenus; +/+
	ABLK>CsChrimson.mVenus	w[*]/y[1] v[1]; Lk-GAL4, tsh-LexA/tubP-FRT-GAL80-FRT; LexAop-FLP.L/UAS-CsChrimson.mVenus
	SELK>CsChrimson.mVenus	w[*]/y[1] v[1]; Lk-GAL4, LexAop-FLP/tubP-FRT-GAL80-FRT; Scr-LexA/UAS-CsChrimson.mVenus
Figure 5D	ABLK>myr:GFP (Control)	w[*]/y[1] v[1]; Lk-GAL4, tsh-LexA/tubP-FRT-GAL80-FRT; LexAop-FLP.L/UAS-myr:GFP
	ABLK>Kir2.1	w[*]/y[1] v[1]; Lk-GAL4, tsh-LexA/tubP-FRT-GAL80-FRT; LexAop-FLP.L/UAS-Kir2.1:GFP
	myr:GFP (yv background)	w[*]/y[1] v[1]; tubP-FRT-GAL80-FRT/+; UAS-myr:GFP/+
	Kir2.1 (yv background)	w[*]/y[1] v[1]; tubP-FRT-GAL80-FRT/+; UAS-Kir2.1:GFP/+
Figure 5E	ABLK>GtACR1, ATR(−)	w[*]/y[1] v[1]; Lk-GAL4, tsh-LexA/tubP-FRT-GAL80-FRT; LexAop-FLP.L/UAS-GtACR1, ATR (−)
	ABLK>GtACR1, ATR(+)	w[*]/y[1] v[1]; Lk-GAL4, tsh-LexA/tubP-FRT-GAL80-FRT; LexAop-FLP.L/UAS-GtACR1, ATR (+)
	GtACR1, ATR(−) (yv background)	w[*]/y[1] v[1]; tubP-FRT-GAL80-FRT/+; UAS-GtACR1/+ , ATR (−)
	GtACR1, ATR(+) (yv background)	w[*]/y[1] v[1]; tubP-FRT-GAL80-FRT/+; UAS-GtACR1/+ , ATR (+)
Figure 5F	ABLK>CsChrimson, ATR(−)	w[*]/y[1] v[1]; Lk-GAL4, tsh-LexA/tubP-FRT-GAL80-FRT; LexAop-FLP.L/UAS-CsChrimson.mVenus, ATR (−)
	ABLK>CsChrimson, ATR(+)	w[*]/y[1] v[1]; Lk-GAL4, tsh-LexA/tubP-FRT-GAL80-FRT; LexAop-FLP.L/UAS-CsChrimson.mVenus, ATR (+)
	CsChrimson, ATR(−) (yv background)	w[*]/y[1] v[1]; tubP-FRT-GAL80-FRT/+; UAS-CsChrimson.mVenus/+ , ATR (−)
	CsChrimson, ATR(+) (yv background)	w[*]/y[1] v[1]; tubP-FRT-GAL80-FRT/+; UAS-CsChrimson.mVenus/+ , ATR (+)
Figure 5G	ABLK>myr:GFP ATR(−)	w[*]/y[1] v[1]; Lk-GAL4, tsh-LexA/tubP-FRT-GAL80-FRT; LexAop-FLP.L/UAS-myr:GFP , ATR (−)
	ABLK>myr:GFP ATR(+)	w[*]/y[1] v[1]; Lk-GAL4, tsh-LexA/tubP-FRT-GAL80-FRT; LexAop-FLP.L/UAS-myr:GFP, ATR (+)

## Sheet: Statistics
Figure	Genotypes or Experimental Condition (Abbreivation) compared		Statistical test	Significance	P values
	Control group	Experimental group
Figure 5A	Lk>CsChrimson, ATR(−)	Lk>CsChrimson, ATR(+)	Chi-squared test	****	<0.0001
	ABLK>CsChrimson, ATR(−)	ABLK>CsChrimson, ATR(+)	Chi-squared test	****	<0.0001
	SELK>CsChrimson, ATR(−)	SELK>CsChrimson, ATR(+)	Chi-squared test	****	<0.0001
	Lk>CsChrimson, ATR(+)	ABLK>CsChrimson, ATR(+)	Chi-squared test	****	<0.0001
	Lk>CsChrimson, ATR(+)	SELK>CsChrimson, ATR(+)	Chi-squared test	n.s.	0.369566
	ABLK>CsChrimson, ATR(+)	SELK>CsChrimson, ATR(+)	Chi-squared test	****	<0.0001
Figure 5D	ABLK>myr:GFP (Control)	ABLK>Kir2.1	Wilcoxon rank sum test	*	0.022042
	myr:GFP (yv background)	Kir2.1 (yv background)	Wilcoxon rank sum test	n.s.	0.994486
Figure 5E	ABLK>GtACR1, ATR(−)	ABLK>GtACR1, ATR(+)	Wilcoxon rank sum test	****	<0.0001
	GtACR1, ATR(−) (yv background)	GtACR1, ATR(+) (yv background)	Wilcoxon rank sum test	n.s.	0.112622
Figure 5F	ABLK>CsChrimson, ATR(−)	ABLK>CsChrimson, ATR(+)	Wilcoxon rank sum test	****	<0.0001
	CsChrimson, ATR(−) (yv background)	CsChrimson, ATR(+) (yv background)	Wilcoxon rank sum test	n.s.	0.176471
Figure 5G	ABLK>myr:GFP ATR(−)	ABLK>myr:GFP ATR(+)	Wilcoxon rank sum test	n.s.	0.428831

## Sheet: Figure_5A
	Behavior
Genotype	Lk>CsChrimson, ATR(+)	Lk>CsChrimson, ATR(−)	ABLK>CsChrimson, ATR(+)	ABLK>CsChrimson, ATR(−)	SELK>CsChrimson, ATR(+)	SELK>CsChrimson, ATR(−)
Animal number (n)	85	49	41	22	46	54
Rolling (n)	78	0	1	0	45	0
Bending (n)	6	10	29	0	1	4
No response (n)	1	39	11	22	0	50
Rolling rate	0.917647	0	0.0243902	0	0.978261	0
Bending rate	0.0705882	0.204082	0.707317	0	0.0217391	0.0740741
No response rate	0.0117647	0.795918	0.268293	1	0	0.925926

## Sheet: Figure_5D
Rolling latency (s)
ABLK>myr:GFP (Control)	ABLK>Kir2.1	myr:GFP (yv background)	Kir2.1 (yv background)
5.06	2	10.05	3.66
7.2	2.14	8.07	5.86
1.4	9.4	7.13	10.05
4.14	9	6.93	8.2
1.07	4.6	8.33	5.67
2.33	3.33	4.8	9.2
3.13	2.8	8.66	5.33
1	2.66	1.8	10.05
10.05	1.33	10.05	4.47
5.26	1.74	3.67	4.73
4.27	6.67	5.53	4.47
2.07	0.93	3.2	10.05
7.46	5.13	6.73	2.73
3.4	0.47	4.93	8.86
2.6	4.8	6.07	2.86
3.07	1.8	3.47	10.05
9.47	2.8	8.93	9.26
10.05	1.53	9.2	4.67
0.6	4.33	7.4	10.05
0.46	0.8	7.2	0.6
10.05	0.87	6	5.8
4.8	0.53	5.47	3.94
1.93	1.4	3	5.4
10.05	5.2	6.8	5.27
7.93	0.33	4.2	2.73
5.87	0.47	10.05	7.27
7.47	1.27	10.05	5.27
1.86	3.6	7.47	6
10.05	0.87	6.93	4.86
6.8	0.47	9.86	10.05
3.4	2.2	6.74	7.93
1.8	2.4	9.2	5.13
0.8	0.87	7.8	5.93
1.93	0.4	7.2	5.13
2.94	3.2	7.93	10.05
4.67	1.6	8.47	4.66
0.53	3.53	5.13	10.05
3	3.27	4.73	4.73
2.06	4.6	4.27	2.47
0.6	3.4	9.53	7.06
3.6	1.93	6.986	10.05
2.46	6	6.66	4.34
	3.8	3.93	4.67
	2.13	3.86	10.05
	1.66	3.86	8.27
		8.93	10.05
		6.12	8.2
		7.67	7.2
		10.05	10.05
		4.47	8.07

## Sheet: Figure_5E
Rolling latency (s)
ABLK>GtACR1, ATR(−)	ABLK>GtACR1, ATR(+)	GtACR1, ATR(−) (yv background)	GtACR1, ATR(+) (yv background)
3.86	10.05	7.73	5.54
3.13	10.05	7.2	9.53
10.05	10.05	5.4	5.2
10.05	5.27	10.05	5.06
1.67	7.33	3.67	9.06
8.14	10.05	10.05	4.2
5.4	10.05	8.4	5.27
5.6	10.05	3.46	5.6
4.6	2.6	9.93	4.73
5.93	10.05	5.14	5.06
10.05	5.27	3.47	5.13
5.13	4.8	8.92	4.66
9.53	10.05	4.6	8.93
10.05	10.05	5.26	4.2
2.6	8.67	8.8	7.47
3.26	10.05	4.93	3.4
5.4	10.05	7.07	4.4
5.27	10.05	5.4	3.4
2.94	7.73	9.47	10.05
10.05	6.33	5.93	3.2
4.67	10.05	10.05	2.87
10.05	5.8	9.13	7.93
3.33	10.05	5.99	2.14
3.2	10.05	4.27	7.4
4.94	6.74	4.4	6.66
4.73	10.05	3.73	4.06
3.93	4	8.47	9.2
8.73	10.05	7.54	10.05
8.13	10.05	2.67	6.47
3	3.53	4.8	10.05
2.53	4.26	2.53	5.8
3.07	7	10.05	7
4.27	10.05	5.47	5.2
10.05	5.4	10.05	3.13
7.06	4.93	5.94	6.53
3.87	4	4.27	2.46
9.47	10.05	9.2	5.07
4.93	7.93	4.73	3.93
7.73	9.06	7.07	10.05
7.67	10.05	5.26	4.4
3.93	10.05	9	9.4
6.47	10.05	7.27	4.4
2.74	10.05	4.27	3.66
3.8	8.07	5.54	2.6
3.86	8.54	7.47	5.27
2.94	10.05	5.34	10.05
3.73	6.53	5.26	6.94
3.54	6.33	7.13	4.53
3.8	10.05	3.66	3.54
7.07	6.6	5.13	3.67
5.13	6.33
2	3.33
4.87	5.2
4.07	8
	10.05
	10.05
	10.05
	1.66
	4.73
	10.05
	5.13
	8.73
	6.33
	4.74
	10.05
	10.05
	10.05
	10.05

## Sheet: Figure_5F
Rolling latency (s)
ABLK>CsChrimson, ATR(−)	ABLK>CsChrimson, ATR(+)	CsChrimson, ATR(−) (yv background)	CsChrimson, ATR(+) (yv background)
3.87	10.05	4.93	4.8
1.07	10.05	3.26	3.87
10.05	10.05	7.26	6.46
10.05	10.05	4.2	7.4
5.2	10.05	5.53	2.67
4.47	10.05	6.33	9.13
7.6	10.05	3.73	10.05
10.05	10.05	3.47	9.73
4.33	9	6.34	4.07
5.74	10.05	10.05	6.6
4.54	6.46	3.8	9.93
4.93	10.05	5.93	4.53
8.87	10.05	9.13	5.54
6.2	10.05	7.13	5.8
5.6	10.05	6.6	7.74
10.05	9.8	7.06	7.73
9.8	8.4	5.94	7.6
9.06	8.07	4.86	4.47
5.13	10.05	5.54	5.13
3.06	10.05	7.93	7.4
10.05	6.86	3.66	4
4.8	8.33	7.6	8.93
4.06	4.14	8.2	5.53
6.74	7	4.13	2.07
10.05	6.67	4.8	6.4
5	1.87	3.07	10.05
3.2	10.05	3.2	6.06
4.14	10.05	9.4	8.2
4.66	10.05	2.13	4.87
9.26	6.33	3.66	7.27
5	6.2	5.73	8.8
10.05	10.05	7.46	5.07
4.47	10.05	7.4	6.87
3.94	10.05	5.14	8.06
5.27	10.05	5.33	7.6
3.67	8.6	5.2	10.05
8.4	9.87	6.66	4.4
9.4	10.05	5.6	3.467
6.73	10.05	6.27	10.05
5.73	7.6	2.93	3.26
3.8	10.05	4.67	7.14
6.53	10.05	6	7.6
7.6	7.6	10.05	5.13
3.66	7.66	10.05	7.4
2.86	10.05	6.34	7.2
10.05	10.05	9.8	6.06
10.05	10.05	7.73	5.74
5.6	10.05	10.05	5.53
7.14	10.05	6.06	9.26
5.14	10.05	6.6	9.2
4.73	9
2.54	10.05
	10.05

## Sheet: Figure_5G
Rolling latency (s)
ABLK>myr:GFP ATR(−)	ABLK>myr:GFP ATR(+)
4.6	10.05
3.6	5.6
2	0.74
2.86	3.73
5.47	5.2
3.54	10.05
10.05	4.13
8.27	3.14
10.05	4.4
6.14	10.05
7.33	3.13
10.05	7.47
10.05	3.06
9.86	6.4
10.05	3.6
6.2	10.05
2.4	9.86
10.05	10.05
10.05	3.33
10.05	10.05
10.05	7
9.46	10.05
7.27	6
10.05	8.46
5.27	7.13
0.27	10.05
1.66	10.05
6.27	2.27
7	10.05
8.6	5.6
6.66	10.05
2.73	3.66
7.53	10.05
10.05	4.4
3.86	1.07
10.05	2.53
1.13	3.67
10.05	5.87
4.07	0.93
7.33	6.14
5.8	2.67
6.4	9.6
3.67	3.27
2.07	1.67
6	10.05
	2.47
