# Supplementary material for: Belly roll, a GPI-anchored Ly6 protein, regulates Drosophila melanogaster escape behaviors by modulating the excitability of nociceptive peptidergic interneurons
Source: eLife journal article supplement (doi:10.7554/elife.83856), 2023-05-15
Supplement: fig6-data1 [file Summary table of genotypes, statistical testing and graph data for Figure 6.xlsx]

## Sheet: Genotypes
Figure	Abbreivation	Genotypes (Experimental Condition)
Figure 6A	Lk>CD4-tdGFP, ACh	y[1] w[*]; LK-GAL4, UAS-hCD4-tdGFP; +/+, Mouse monoclonal anti-ChAT
	Lk>CD4-tdGFP, GABA	y[1] w[*]; LK-GAL4, UAS-hCD4-tdGFP; +/+, Rabbit polyclonal anti-GABA
	Lk>CD4-tdGFP, Glu	y[1] w[*]; LK-GAL4, UAS-hCD4-tdGFP/vGlut-LexA, LexAop-jRCaMP1b; UAS-ChR2.T159C-HA/+
	Lk>CD4-tdGFP, OA/TA	y[1] w[*]; LK-GAL4, UAS-hCD4-tdGFP; +/+, Rabbit polyclonal anti-Tdc2
Figure 6B	ABLK>attP2	w[*]/y[1] v[1]; Lk-GAL4, tsh-LexA/tubP-FRT-GAL80-FRT; LexAop-FLP.L/attP2
	ABLK>Tbh RNAi	w[*]/y[1] v[1]; Lk-GAL4, tsh-LexA/tubP-FRT-GAL80-FRT; LexAop-FLP.L/UAS-Tbh-RNAi
	attP2 (yv background)	w[*]/y[1] v[1]; tubP-FRT-GAL80-FRT/+; attP2/+
	Tbh RNAi (yv background)	w[*]/y[1] v[1]; tubP-FRT-GAL80-FRT/+; UAS-Tbh-RNAi/+
	ABLK>attP2	w[*]/y[1] v[1]; Lk-GAL4, tsh-LexA/tubP-FRT-GAL80-FRT; LexAop-FLP.L/attP2
	ABLK>DH44 RNAi	w[*]/y[1] v[1]; Lk-GAL4, tsh-LexA/tubP-FRT-GAL80-FRT; LexAop-FLP.L/UAS-DH44-RNAi
	attP2 (yv background)	w[*]/y[1] v[1]; tubP-FRT-GAL80-FRT/+; attP2/+
	DH44 RNAi (yv background)	w[*]/y[1] v[1]; tubP-FRT-GAL80-FRT/+; UAS-DH44-RNAi/+

## Sheet: Statistics
Figure	Genotypes or Experimental Condition (Abbreivation) compared		Statistical test	Significance	P values
	Control group	Experimental group
Figure 6B	ABLK>attP2 (Control)	ABLK>Tbh RNAi	Wilcoxon rank sum test	*	0.026946
	attP2 (yv background)	Tbh RNAi (yv background)	Wilcoxon rank sum test	n.s.	0.832376
	ABLK>attP2 (Control)	ABLK>DH44 RNAi	Wilcoxon rank sum test	**	0.002376
	attP2 (yv background)	DH44 RNAi (yv background)	Wilcoxon rank sum test	n.s.	0.856016

## Sheet: Figure_6B
Rolling latency (s)
ABLK>attP2 (Control)	ABLK>Tbh RNAi	attP2 (yv background)	Tbh RNAi (yv background)		ABLK>attP2 (Control)	ABLK>DH44 RNAi	attP2 (yv background)	DH44 RNAi (yv background)
0.73	5.4	10.05	2.53		7.13	10.05	6.67	6.46
5.74	10.05	3.67	8.2		10.05	5.74	4.33	7.33
7.93	10.05	8.87	4.34		5.4	6.33	8.13	10.05
2.66	5.74	8.46	2.4		5.47	10.05	9.8	7.8
6.87	7.93	2.53	5.4		3.14	4.2	10.05	9.2
2.87	10.05	4.87	2.73		10.05	8.27	5.93	5.85
10.05	10.05	6.8	7.13		6.4	10.05	7.27	10.05
4.34	6.47	5.2	2.94		10.05	7.73	7.74	3.73
4.53	10.05	10.05	10.05		3.73	8.87	6.93	4.27
4.14	10.05	5.2	5.53		7.93	8.27	5.66	8.94
4.73	1.4	5.27	6.2		10.05	10.05	4.13	8.25
5.14	4.74	3.47	10.05		5.87	10.05	6.93	1.86
6.07	10.05	10.05	10.05		4.6	7	6.4	10.05
1.73	4.4	5.87	4.34		10.05	10.05	5.13	10.05
10.05	7.73	4.6	3.53		10.05	6.07	6.8	10.05
2.2	6.74	3.4	4.6		4.13	10.05	10.05	4.13
3	3.33	5.14	9.73		3	10.05	7.14	6.93
10.05	3.34	7.14	3.87		4.47	9.26	4.46	6.4
8.2	10.05	6.67	6.74		6.94	7.87	3.2	5.13
5.34	4.06	4.06	8.8		7.06	10.05	4.14	6.8
2.13	3.6	3.53	4.2		6.46	6.8	6.87	5.93
10.05	10.05	7.47	9		2.53	10.05	5.53	5.54
2.47	10.05	10.05	6.26		0.74	4.74	10.05	6.2
2.2	3.8	4.34	3.53		8.13	2.67	10.05	4.4
10.05	10.05	1.4	8.13		1.34	3.73	9.2	4.53
0.6	2.94	4.33	2.27		1.8	8	4.67	5.47
8.53	9.2	10.05	2		1.6	3.2	3.34	9.8
2.73	3.66	5.8	10.05		10.05	10.05	3.47	2.8
4.67	4.4	1	5.74		5.07	7.54	5.4	7.93
10.05	10.05	3	3.46		6.6	4.27	10.05	3.13
9.6	3.8	7.6	1.07		4.27	10.05	4.27	3.4
6	10.05	5.73	4.6		5.74	10.05	3.74	10.05
5.73	5	1.93	3.27		10.05	8.54	3.87	2.26
4.87	10.05	5.8	10.05		3.74	7.33	2.66	1.27
1.73	10.05	4.47	8.46		3.2	7.8	4.34	2.6
8.6	10.05	4.8	10.05		4.13	6.2	3	9.54
10.05	2	10.05	2.4		2.27	7.2	4.8	5.27
6	6.2	5.73	7		6.93	5.66	4	2.66
0.4	1.66	2.07	3.86		7.4	10.05	2.8	1.73
10.05	5.26	1.67	4.93		5.8	10.05	10.05	2.33
3.8	10.05	8.87	9.06		6.06	10.05	2.93	4.34
4.4	6.86	9.6	10.05		4.33	7.87	3.73	3
3.53	6.13	6.4	7.2		3.87	10.05	1.4	4.8
4.93	10.05	10.05	4.6		4.4	5.8	5.87	4
2.67	8.33	10.05	2.94		2.4	4.34	4.46	2.8
	4.93	6.6	10.05		10.05	1.4	5.13	4.53
	4.73	2.6	4.4		2.94	3	5.2	3.93
	4.4	4.93	8.26		1.93	10.05	4.6	10.05
	3	3.13	0.87		4.6	7.2		3.2
	7.73	10.05	3.93		3.13	1.54		7.53
	1.86	7.27	10.05		2.2	8.73
	7.87	5.47			4.86	6.73
	10.05				10.05	5.07
	7.33				6.33	9.6
	10.05				4.33	9.4
	7.34				4.66	4.07
	0.6				4.4	10.05
	2.6				6.13	3.2
	10.05				5.6	4.07
					10.05	4
					10.05	10.05
					10.05	9.2
					2.72	10.05
					4.6	6.8
					2.34	9.07
					5.67	6.27
					5.4	10.05
					3.33	2.86
					6.33	4.73
					5.87	5.6
					6.74	3.67
					5.14	0.2
					4.07	7.46
					10.05	3.73
					4.67	2.93
					9	10.05
					5.8	1.87
					8.3	10.05
					1.66	5
						10.05
						9.4
						3.47
						4
