# Supplementary material for: Belly roll, a GPI-anchored Ly6 protein, regulates Drosophila melanogaster escape behaviors by modulating the excitability of nociceptive peptidergic interneurons
Source: eLife journal article supplement (doi:10.7554/elife.83856), 2023-05-15
Supplement: fig6-figsupp1-data1 [file Summary table of genotypes, statistical testing and graph data for Figure 6-figure supplement 1.xlsx]

## Sheet: Genotypes
Figure	Abbreivation	Genotypes (Experimental Condition)
Figure 6 - figure supplement 1A	ABLK>attP2	w[*]/y[1] v[1]; Lk-GAL4, tsh-LexA/tubP-FRT-GAL80-FRT; LexAop-FLP.L/attP2
	ABLK>Lk RNAi	w[*]/y[1] v[1]; Lk-GAL4, tsh-LexA/tubP-FRT-GAL80-FRT; LexAop-FLP.L/UAS-LK-RNAi
	attP2 (yv background)	w[*]/y[1] v[1]; tubP-FRT-GAL80-FRT/+; attP2/+
	Lk RNAi (yv background)	w[*]/y[1] v[1]; tubP-FRT-GAL80-FRT/+; UAS-LK-RNAi/+
Figure 6 - figure supplement 1B	ABLK>attP40	w[*]/y[1] v[1]; Lk-GAL4, tsh-LexA/attP40; LexAop-FLP.L/tubP-FRT-GAL80-FRT
	ABLK>Rdl RNAi	w[*]/y[1] v[1]; Lk-GAL4, tsh-LexA/UAS-Rdl RNAi; LexAop-FLP.L/tubP-FRT-GAL80-FRT
	attP40 (yv background)	w[*]/y[1] v[1]; attP40/+; tubP-FRT-GAL80-FRT/+
	Rdl RNAi (yv background)	w[*]/y[1] v[1]; UAS-Rdl RNAi/+; tubP-FRT-GAL80-FRT/+
Figure 6 - figure supplement 1C	ABLK>att2	w[*]/y[1] v[1]; Lk-GAL4, tsh-LexA/tubP-FRT-GAL80-FRT; LexAop-FLP.L/attP2
	ABLK>5-HT1B RNAi	w[*]/y[1] v[1]; Lk-GAL4, tsh-LexA/tubP-FRT-GAL80-FRT; LexAop-FLP.L/UAS-5-HT1B-RNAi

## Sheet: Statistics
Figure	Genotypes or Experimental Condition (Abbreivation) compared		Statistical test	Significance	P values
	Control group	Experimental group
Figure 6 - figure supplement 1A	ABLK>attP2 (Control)	ABLK>Lk RNAi	Wilcoxon rank sum test	*	0.026271
	attP2 (yv background)	Lk RNAi (yv background)	Wilcoxon rank sum test	*	0.040637
Figure 6 - figure supplement 1B	ABLK>attP40 (Control)	ABLK>Rdl RNAi	Wilcoxon rank sum test	*	0.01213
	attP40 (yv background)	Rdl RNAi (yv background)	Wilcoxon rank sum test	n.s.	0.52204
Figure 6 - figure supplement 1C	ABLK>attP2 (Control)	ABLK>5-HT1B RNAi	Wilcoxon rank sum test	n.s.	0.202737

## Sheet: Figure 6 - figure supplement 1A
Rolling latency (s)
ABLK>attP2 (Control)	ABLK>Lk RNAi	attP2 (yv background)	Lk RNAi (yv background)
8.27	1.47	3.54	7.34
4.94	7	3.86	10.05
10.05	3.07	7.4	10.05
5.47	5.4	6.8	10.05
2.8	2.33	10.05	5.66
8.93	5	3.07	8.8
2.2	10.05	4	5.14
3.2	5.07	4.93	10.05
10.05	3.54	10.05	6.06
6.06	3.54	2.94	4.33
6.27	10.05	7.73	4.66
7.2	10.05	2.53	10.05
10.05	10.05	8.67	5.6
6.13	10.05	4.4	10.05
7	10.05	10.05	5.02
7.87	2.8	5.33	5.99
10.05	10.05	3.2	5.93
9.2	8.8	7.87	2.94
10.05	2.93	10.05	5.94
1.87	7.26	10.05	8.4
7.53	3.34	4.93	5.87
10.05	10.05	3.27	5.4
4.06	4.46	10.05	6.26
1.8	7.93	10.05	4.8
4.13	10.05	4.66	7.14
1.4	4.47	4.8	3.67
10.05	1.66	6.47	3.4
2.73	0.8	9.07	10.05
4.73	8	5.66	7.27
0.67	7.27	8.13	8.13
3.73	10.05	4.33	9.14
1.06	10.05	3.47	10.05
1.2	10.05	5.8	10.05
0.67		6.79	9.2
1.74		5.8	8.07
1.07		1.74	7.8
7.46		3.53	3.13
2.4		3.6	4.66
4.34		10.05	10.05
6		7.86	4.74
8.73		5.27	6.26
6.86		4.27	4.73
		5.6	5.87
		4.8	4.54
		4.67	9.2
		3.8	7.46
		6.27	3.94
		6.86	9.2
			6.4
			10.05

## Sheet: Figure 6 - figure supplement 1B
Rolling latency (s)
ABLK>attP40 (Control)	ABLK>Rdl RNAi	attP40 (yv background)	Rdl RNAi (yv background)
4.4	10.05	3.65	7.6
9.93	7.87	10.05	6.54
10.05	5.8	4.2	4.93
4.53	7.2	8.4	9.27
10.05	3.46	5.2	10.05
10.05	9.14	3.67	4.39
10.05	3	5.67	3.94
10.05	6.34	2.53	2.2
8.33	6.07	7.47	3.47
10.05	2.27	1.27	6.14
10.05	4	4.27	5.6
10.05	3.67	3.4	6.2
10.05	10.05	2.06	10.05
10.05	10.05	6.34	3.6
3.94	7.47	2.93	7.06
10.05	10.05	4.07	5.34
6.6	7.87	2.07	5.67
7.53	7.2	7.13	10.05
8.87	10.05	1.99	5.13
10.05	6.93	3.93	4.86
10.05	6.07	10.05	2.4
3.26	4.4	6.2	2
10.05	10.05	4.2	2.93
3.94	10.05	8.93	3.13
5.47	9.33	2.2	5.93
10.05	4.67	10.05	7.6
10.05	5.8	5.93	9.33
9.2	5.13	6.2	4.86
5.73	4.73	7.53	4.2
10.05	10.05	8.73	4.27
10.05	6.73	10.05	2.53
10.05	10.05	3.94	4.8
7.46	10.05	10.05	4.6
10.05	10.05	5.94	2.86
10.05	10.05	5.13	1.06
9.53	10.05	6.73	5.14
7.4	4.53	5.53	0.86
10.05	9.13	8	9.2
10.05			3.13
10.05			7.67
10.05
9.27

## Sheet: Figure 6 - figure supplement 1C
Rolling latency (s)
ABLK>attP2 (Control)	ABLK>5-HT1B RNAi
3.13	10.05
10.05	4.74
10.05	2.87
7.47	1
2.73	7.86
3.34	2.47
1.67	10.05
5.33	3.54
0.53	4
2.2	4.8
3.66	6.33
3.14	5.4
10.05	3.14
0.67	6.67
2.4	2
6.94	7.07
2	4.67
1.67	3.4
0.73	3.93
1.07	2.53
2.73	5.67
1.27	1.4
2.6	1.46
3	10.05
1.06	4.73
1	1.66
1.34	2
2.74	5.87
1.6	3
0.94	1.2
2.33	3.07
0.93	0.8
5.54	0.27
1.14	1.13
2	0.66
1.2	0.8
0.67	0.8
5.87	1.67
6.54	3.6
4.33	10.05
4.54	7.13
1.87	6.4
4.2	3.87
2.27	6.07
1.74	8.06
1.2	0.2
2.07	6.34
8.6	4.74
0.4	9.8
3.27	0.8
0.53	1.4
2.13	3.33
0.94	0.8
3.53	5.34
0.53	1
3.2	1.4
0.4	2.87
3.8	8.14
3	2.4
2.53	0.6
10.05	1.07
1	2.2
7	2.26
1.8	1.14
1.67	6.33
0.94	2.07
3.07	1.33
10.05	4
1.4	0.73
3.73	0.6
3.87	3.33
1.86	2.27
3.74	1.26
1.34	6.27
8.2	1.47
2.66	5.6
1	3.8
2.14	9.06
7.4	3.2
2.46	2.06
4.74	8.06
4.87	2.6
0.47	1.27
5.07
2.4
2.87
