# Supplementary material for: Belly roll, a GPI-anchored Ly6 protein, regulates Drosophila melanogaster escape behaviors by modulating the excitability of nociceptive peptidergic interneurons
Source: eLife. 2023 Jun 13;12:e83856. doi: 10.7554/eLife.83856 (PMC10264074; doi:10.7554/eLife.83856)
Supplement: Supplementary file 1. [file elife-83856-supp1.xlsx]

## Sheet: Supplementary file 1
Supplementary file 1. Oligonucleotide sequences, Related to Materials and Methods
shRNA#1 Upper	5'-ctagcagtGCACCAAGGACGAGTGCAACGtagttatattcaagcataCGTTGCACTCGTCCTTGGTGCgcg-3'
shRNA#1 Lower	5'-aattcgcGCACCAAGGACGAGTGCAACGtatgcttgaatataactaCGTTGCACTCGTCCTTGGTGCactg-3'
shRNA#2 Upper	5'-ctagcagtCCTCTATGCCGTTCGTTAAGCtagttatattcaagcataGCTTAACGAACGGCATAGAGGgcg-3'
shRNA#2 Lower	5'-aattcgcCCTCTATGCCGTTCGTTAAGCtatgcttgaatataactaGCTTAACGAACGGCATAGAGGactg-3'
bero RT-PCR top 5UTR primer	5'-ATGCGGCCGCCACACTCGAAGTATTCGCGAAAATGGTGTC-3'
bero RT-PCR bot Term primer	5'-ATTCTAGACTAGGCCAGCAGACGAGCCACGCCGAAGAA-3'
αTub84B RT-PCR tub-F primer	5’-GGACGTCAACGCCGCTATTG-3’
αTub84B RT-PCR tub-R primer	5’-TTGGACAACATGCACACGGC-3’
top FLAG primer	5'-GCTGACTACAAAGACGATGACGACAAGGCTTGCTACCAGTGCGAGTCCCTCACAATG-3'
bot FLAG primer	5'-AGCCTTGTCGTCATCGTCTTTGTAGTCAGCCTTGATGGCGTAGGCCGAACAAGCCAG-3'
Upstream PCR Foward primer	5'-CTCTCGTGCCAAGATGAGC-3'
Upstream PCR Reverse primer	5'-CGAGGGTTCGAAATCGATAA-3'
Downstream PCR Foward primer	5'-AACGCAAGCAAATGTGTCAG-3'
Downstream PCR Reverse primer	5'-AAGCTAGCGCTCGATCTTGA-3'
5' Homology arm Forward primer	5’-ACCAGACGGGTCTTCCAAAG-3’
5' Homology arm Reverse primer	5’-CTTCGAGTGTGGGAATTGCT-3’
3' Homology arm Forward primer	5’-ATCTTAACTAGCTAGTAAATTACCTG-3’
3' Homology arm Reverse primer	5’-CGCCTTGCTGAAAGTTCTTC-3’
Oligo DNA for the upstream gRNA	5'-CAGACTGATCATAACGGCCA[CGG]-3'
Oligo DNA for the downstream gRNA	5'-CATCCTGCTCTTCTTCGGCG[TGG]-3'
