# Supplementary material for: Belly roll, a GPI-anchored Ly6 protein, regulates Drosophila melanogaster escape behaviors by modulating the excitability of nociceptive peptidergic interneurons
Source: eLife. 2023 Jun 13;12:e83856. doi: 10.7554/eLife.83856 (PMC10264074; doi:10.7554/eLife.83856)
Supplement: Supplementary file 2. [file elife-83856-supp2.xlsx]

## Sheet: Supplementary file 2
Supplementary file 2. Basic sequence analysis of 2L_20859945_SNP neighbouring sequence based on JASPAR CORE TF-binding profiles Putative site(s) were predicted with relative profile score threshold 80%.
Putative sites for sequence with Minor allele: CTATAACATATAG
Matrix ID	Name	Score	Relative score	Start	End	Strand	Predicted sequence
MA0173.1	MA0173.1.CG11617	8.54219	0.890853	3	9	+	ATAACAT
MA0015.1	MA0015.1.Cf2	8.27843	0.853221	4	13	-	CTATATGTTA
MA0217.1	MA0217.1.caup	7.88151	1	4	8	+	TAACA
MA0233.1	MA0233.1.mirr	7.704	0.996821	4	8	+	TAACA
MA0210.1	MA0210.1.ara	7.51791	1	4	8	+	TAACA
MA0216.1	MA0216.1.cad	5.08559	0.814982	1	7	-	GTTATAG
MA0448.1	MA0448.1.H2.0	5.05434	0.82919	1	7	-	GTTATAG
MA0094.1	MA0094.1.Ubx	4.20453	0.851036	3	6	-	TTAT
MA0094.1	MA0094.1.Ubx	3.46535	0.810437	4	7	+	TAAC
	Number of candidate TFs :
	8
Putative sites for sequence with Major allele: CTATAATATATAG
Matrix ID	Name	Score	Relative score	Start	End	Strand	Predicted sequence
MA0015.1	MA0015.1.Cf2	8.45574	0.85761	4	13	-	CTATATATTA
MA0182.1	MA0182.1.CG4328-RA	7.708	0.944636	4	10	-	TATATTA
MA0174.1	MA0174.1.Dbx	7.56049	0.911159	4	10	-	TATATTA
MA0197.1	MA0197.1.nub	7.00325	0.861809	2	9	+	TATAATAT
MA0094.1	MA0094.1.Ubx	6.91669	1	4	7	+	TAAT
MA0216.1	MA0216.1.cad	6.48731	0.863039	4	10	-	TATATTA
MA0448.1	MA0448.1.H2.0	6.21074	0.873206	4	10	-	TATATTA
MA1836.1	MA1836.1.dsx	6.09904	0.827114	1	11	+	CTATAATATAT
MA0178.1	MA0178.1.CG32105	6.09613	0.818848	4	10	-	TATATTA
MA0176.1	MA0176.1.CG15696-RA	5.69682	0.828989	4	10	-	TATATTA
MA0165.1	MA0165.1.Abd-B	5.5348	0.825259	4	10	-	TATATTA
MA0448.1	MA0448.1.H2.0	5.50789	0.846453	1	7	-	ATTATAG
MA0457.1	MA0457.1.PHDP	5.48558	0.823588	3	9	+	ATAATAT
MA0195.1	MA0195.1.Lim3	5.15201	0.81415	4	10	-	TATATTA
MA0216.1	MA0216.1.cad	5.08559	0.814982	1	7	-	ATTATAG
MA0182.1	MA0182.1.CG4328-RA	4.8738	0.838717	1	7	-	ATTATAG
MA0094.1	MA0094.1.Ubx	4.20453	0.851036	3	6	-	TTAT
MA0216.2	MA0216.2.cad	2.40427	0.807256	2	12	+	TATAATATATA
	Number of candidate TFs :
	14
Unshared Putative sites
Matrix ID	Name	Score	Relative score	Start	End	Strand	Predicted sequence
MA0173.1	MA0173.1.CG11617	8.54219	0.890853	3	9	+	ATAACAT
MA0217.1	MA0217.1.caup	7.88151	1	4	8	+	TAACA
MA0182.1	MA0182.1.CG4328-RA	7.708	0.944636	4	10	-	TATATTA
MA0233.1	MA0233.1.mirr	7.704	0.996821	4	8	+	TAACA
MA0174.1	MA0174.1.Dbx	7.56049	0.911159	4	10	-	TATATTA
MA0210.1	MA0210.1.ara	7.51791	1	4	8	+	TAACA
MA0197.1	MA0197.1.nub	7.00325	0.861809	2	9	+	TATAATAT
MA1836.1	MA1836.1.dsx	6.09904	0.827114	1	11	+	CTATAATATAT
MA0178.1	MA0178.1.CG32105	6.09613	0.818848	4	10	-	TATATTA
MA0176.1	MA0176.1.CG15696-RA	5.69682	0.828989	4	10	-	TATATTA
MA0165.1	MA0165.1.Abd-B	5.5348	0.825259	4	10	-	TATATTA
MA0457.1	MA0457.1.PHDP	5.48558	0.823588	3	9	+	ATAATAT
MA0195.1	MA0195.1.Lim3	5.15201	0.81415	4	10	-	TATATTA
MA0216.2	MA0216.2.cad	2.40427	0.807256	2	12	+	TATAATATATA
	Number of candidate TFs :
	14
